# Supplementary material for: Unraveling the contributions of hydrogen-bonding interactions to the activity of native and non-native ligands in the quorum-sensing receptor LasR
Source: Royal Society of Chemistry journal article supplement (doi:10.1039/c4ob02252a), 2014-11-25
Supplement: c4ob02252a1.pdf [file c4ob02252a1.pdf]

## SUPPLEMENTARY INFORMATION

# Unraveling the contributions of hydrogen-bonding interactions to the activity of native and non-native ligands in the quorum-sensing receptor LasR

Joseph P. Gerdt,<sup>a,†</sup> Christine E. McInnis,<sup>a,b,†</sup> Trevor L. Schell,<sup>a</sup> and Helen E. Blackwell<sup>a,\*</sup>

<sup>a</sup> *Department of Chemistry, University of Wisconsin–Madison, 1101 University Avenue, Madison, WI 53706 USA*

<sup>b</sup> *Current address: Dow Microbial Control, The Dow Chemical Company, 400 Arcola Road, PO Box 7000, Collegeville, PA 19426 USA*

<sup>†</sup> These authors contributed equally to this work.

\* To whom correspondence should be addressed: [blackwell@chem.wisc.edu](mailto:blackwell@chem.wisc.edu)  
(608) 262-1503

### CONTENTS.

- **Table S1.** Catalog of LasR mutants generated in this study and selected previously reported data for LuxR-type proteins with related mutations.
- **Table S2.** Bacterial strains and plasmids used in this study.
- **Table S3.** Primers for site-directed mutagenesis.
- **Table S4.** Sequence alignment of 100 LasR homologs.
- **Table S5.** Conservation among 100 LasR homologs at mutated sites in this study.
- **Figure S1.** Dose-response curves for mutant LasRs with OdDHL.
- **Figure S2.** Dose-response curves for mutant LasRs with ligand **1**.
- **References**

**Table S1. Catalog of LasR mutants generated in this study and selected previously reported data for LuxR-type proteins with related mutations.**

| <i>This study</i>           | <i>Previous studies</i> |               |                                                                                                         |           |
|-----------------------------|-------------------------|---------------|---------------------------------------------------------------------------------------------------------|-----------|
| LasR mutation               | LuxR-type protein       | Mutation      | Effect on activity with native ligand                                                                   | Reference |
| <b>Y56F</b>                 | LasR                    | Y56C          | present in QS-deficient clinical isolate                                                                | 1         |
|                             | LasR                    | Y56F          | no change                                                                                               | 2         |
|                             | LuxR                    | Y62F          | significant decrease in sensitivity                                                                     | 3         |
|                             | TraR                    | Y53F          | moderate decrease in sensitivity                                                                        | 4         |
|                             | TraR                    | Y53S          | inactive or major decrease in sensitivity                                                               | 4         |
| <b>W60F</b>                 | LasR                    | W60F          | moderate decrease in sensitivity                                                                        | 2         |
|                             | LuxR                    | W66H          | inactive                                                                                                | 3         |
|                             | TraR                    | W57F          | inactive or major decrease in sensitivity                                                               | 4         |
| <b>R61M</b>                 | TraR                    | W57Y          | inactive or major decrease in sensitivity                                                               | 4         |
|                             | LasR                    | R61M          | moderate decrease in sensitivity                                                                        | 5         |
| <b>D73L</b>                 | LuxR                    | R67M          | inactive or major decrease in sensitivity                                                               | 5         |
|                             | LasR                    | D73E          | loss in activity (sensitivity not reported)                                                             | 6         |
| <b>T75V</b><br><b>W88F</b>  | LasR                    | D73N          | not determined                                                                                          | 7         |
|                             | LuxR                    | D79N          | inactive                                                                                                | 3, 8      |
|                             | TraR                    | D70E          | inactive                                                                                                | 9         |
|                             | TraR                    | D70N          | inactive                                                                                                | 9         |
|                             | TraR                    | D70S          | inactive or major decrease in sensitivity                                                               | 4         |
|                             | TraR                    | D70V          | inactive or major decrease in sensitivity                                                               | 4         |
|                             | RhlR                    | D81E          | did not bind native ligand <i>in vitro</i>                                                              | 10        |
|                             | LasR                    | T75K          | present in QS-deficient clinical isolate                                                                | 1         |
|                             | LasR                    | W88Y          | loss in activity (sensitivity not reported)                                                             | 6         |
|                             | LasR                    | W88C          | not determined                                                                                          | 11        |
| <b>Y93F</b><br><b>T115V</b> | LuxR                    | W94D          | inactive                                                                                                | 3         |
|                             | LuxR                    | W94Q          | could not be stably expressed                                                                           | 12        |
| <b>S129A</b>                | none                    |               |                                                                                                         |           |
|                             | LasR                    | T115I         | isolated PAO1 mutant had major deficiencies in producing OdDHL, BHL, elastase, and nucleoside hydrolase | 13-14     |
|                             | TraR                    | T115I         | significant decrease in sensitivity                                                                     | 4         |
|                             | TraR                    | T129S         | no change                                                                                               | 4         |
|                             | TraR                    | T129A         | inactive or major decrease in sensitivity                                                               | 4         |
|                             | TraR                    | T129V         | significant decrease in sensitivity                                                                     | 4         |
|                             | TraR                    | T129L         | inactive or major decrease in sensitivity                                                               | 4         |
|                             | TraR                    | T129I         | inactive or major decrease in sensitivity                                                               | 4         |
| <b>N/A*</b>                 | TraR                    | T129F         | inactive or major decrease in sensitivity                                                               | 4         |
|                             | CviR                    | M89A          | moderate decrease in sensitivity                                                                        | 15        |
|                             | CviR                    | M89S          | moderate decrease in sensitivity                                                                        | 15        |
|                             | CviR                    | M89L          | no change                                                                                               | 15        |
|                             | CviR                    | M89F          | no change                                                                                               | 15        |
| <b>N/A*</b>                 | CviR'                   | S89M/<br>N77Y | maximum activity substantially decreased                                                                | 15        |
|                             | QscR                    | S56G          | moderate decrease in sensitivity                                                                        | 16        |
|                             | QscR                    | S56T          | slight decrease in sensitivity                                                                          | 16        |

\* Nearby residues in CviR and QscR not examined in this study; data included here to be comprehensive.

**Table S2. Bacterial strains and plasmids used in this study.**

| Strain or plasmid | Description*                                                                                                                                                  | Reference  |
|-------------------|---------------------------------------------------------------------------------------------------------------------------------------------------------------|------------|
| <i>E. coli</i>    |                                                                                                                                                               |            |
| DH5a              | F <sup>-</sup> , j80d/lacZDM15D(lacZYA-argF)U169 deoR recA1 endA1<br>hsdR17(rk <sup>-</sup> , mk <sup>+</sup> ) phoA supE44 λ <sup>-</sup> thi-1 gyrA96 relA1 | Invitrogen |
| <i>Plasmids</i>   |                                                                                                                                                               |            |
| pJN105L           | Arabinose-inducible expression plasmid for <i>lasR</i> ; Gm <sup>R</sup>                                                                                      | 17         |
| pSC11             | <i>lasI-lacZ</i> transcriptional fusion reporter plasmid; Ap <sup>R</sup>                                                                                     | 18         |
| pJG002            | Y56F mutant analog of pJN105L                                                                                                                                 | 19         |
| pJG005            | W88F mutant analog of pJN105L                                                                                                                                 | 19         |
| pJG008            | W60F mutant analog of pJN105L                                                                                                                                 | 19         |
| pJG009            | R61M mutant analog of pJN105L                                                                                                                                 | 19         |
| pJG010            | D73L mutant analog of pJN105L                                                                                                                                 | 19         |
| pJG011            | T75V mutant analog of pJN105L                                                                                                                                 | 19         |
| pJG012            | Y93F mutant analog of pJN105L                                                                                                                                 | This study |
| pJG0013           | T115V mutant analog of pJN105L                                                                                                                                | 19         |
| pJG014            | S129A mutant analog of pJN105L                                                                                                                                | 19         |

\*Abbreviations: Gm<sup>R</sup>, gentamicin resistance; Ap<sup>R</sup>, ampicillin resistance

**Table S3. Primers for site-directed mutagenesis.**

| Mutation               | Forward primer sequence <sup>a</sup> | Reverse primer sequence <sup>a</sup> |
|------------------------|--------------------------------------|--------------------------------------|
| flanking primers       | CGATTAGAAATTCCTTAAGAAGAACGTAGCGCTATG | CCACGCTCTAGAGGCAAGA                  |
| <b>Y56F</b> (TAC→TTC)  | TCGGCAACT <b>TTC</b> CCGGCCGC        | GCGGCCGG <b>GAA</b> GTTGCCGA         |
| <b>W60F</b> (TGG→TTC)  | GGCCGCC <b>TTC</b> CGCGAGCATT        | AATGCTCGCG <b>GAG</b> GCGGCC         |
| <b>R61M</b> (CGC→ATG)  | GGCCGCCTGG <b>ATG</b> GAGCATTACG     | CGTAATGCTC <b>CAT</b> CCAGGCGGCC     |
| <b>D73L</b> (GAC→CTC)  | GCGGGT <b>CCTC</b> CCGACGGTCA        | TGACCGTCGG <b>GAG</b> GACCCGC        |
| <b>T75V</b> (ACG→GTG)  | GGTCGACCCG <b>GTG</b> TCAGTCACT      | AGTGACTGAC <b>CAC</b> CGGGTCGACC     |
| <b>W88F</b> (TGG→TTC)  | GCCGATTTTC <b>TTC</b> GAACCGTCCA     | TGGACGGTTC <b>GAA</b> GAAAAATCGGC    |
| <b>Y93F</b> (TAC→TTC)  | ACCGTCCATC <b>TTC</b> CAGACGCGAA     | TTCGCGTCTG <b>GAA</b> GATGGACGGT     |
| <b>T115V</b> (ACC→GTC) | GTATGGGCTG <b>GTC</b> ATGCCGCTGC     | GCAGCGGCAT <b>GAC</b> CAGCCCATAC     |
| <b>S129A</b> (AGC→GCC) | GCGCGCTG <b>GCC</b> TCAGCGT          | ACGCTGAG <b>GGC</b> CAGCGCGC         |

<sup>a</sup>**Bold** = mutated codon

**Table S4. Sequence alignment of 100 LasR homologs.**

Boxed residues are those mutated in this study.

|                  | 1     | 10    | 20    | 30    | 40    | 50    | 60    | 70    | 80    | 90    | 100   | 110   | 120   | 125   |
|------------------|-------|-------|-------|-------|-------|-------|-------|-------|-------|-------|-------|-------|-------|-------|
| LasR(aag04819.1) | ----- | ----- | ----- | ----- | ----- | ----- | ----- | ----- | ----- | ----- | ----- | ----- | ----- | ----- |
| YP_001747665     | ----- | ----- | ----- | ----- | ----- | ----- | ----- | ----- | ----- | ----- | ----- | ----- | ----- | ----- |
| YP_001991323     | ----- | ----- | ----- | ----- | ----- | ----- | ----- | ----- | ----- | ----- | ----- | ----- | ----- | ----- |
| YP_569310        | ----- | ----- | ----- | ----- | ----- | ----- | ----- | ----- | ----- | ----- | ----- | ----- | ----- | ----- |
| YP_002232821     | ----- | ----- | ----- | ----- | ----- | ----- | ----- | ----- | ----- | ----- | ----- | ----- | ----- | ----- |
| YP_624828        | ----- | ----- | ----- | ----- | ----- | ----- | ----- | ----- | ----- | ----- | ----- | ----- | ----- | ----- |
| YP_002158591     | ----- | ----- | ----- | ----- | ----- | ----- | ----- | ----- | ----- | ----- | ----- | ----- | ----- | ----- |
| YP_002265247     | ----- | ----- | ----- | ----- | ----- | ----- | ----- | ----- | ----- | ----- | ----- | ----- | ----- | ----- |
| YP_855658        | ----- | ----- | ----- | ----- | ----- | ----- | ----- | ----- | ----- | ----- | ----- | ----- | ----- | ----- |
| YP_776923        | ----- | ----- | ----- | ----- | ----- | ----- | ----- | ----- | ----- | ----- | ----- | ----- | ----- | ----- |
| YP_002955225     | ----- | ----- | ----- | ----- | ----- | ----- | ----- | ----- | ----- | ----- | ----- | ----- | ----- | ----- |
| YP_002537872     | ----- | ----- | ----- | ----- | ----- | ----- | ----- | ----- | ----- | ----- | ----- | ----- | ----- | ----- |
| YP_002871035     | ----- | ----- | ----- | ----- | ----- | ----- | ----- | ----- | ----- | ----- | ----- | ----- | ----- | ----- |
| NP_106527        | ----- | ----- | ----- | ----- | ----- | ----- | ----- | ----- | ----- | ----- | ----- | ----- | ----- | ----- |
| YP_001242900     | ----- | ----- | ----- | ----- | ----- | ----- | ----- | ----- | ----- | ----- | ----- | ----- | ----- | ----- |
| YP_001203095     | ----- | ----- | ----- | ----- | ----- | ----- | ----- | ----- | ----- | ----- | ----- | ----- | ----- | ----- |
| YP_001927660     | ----- | ----- | ----- | ----- | ----- | ----- | ----- | ----- | ----- | ----- | ----- | ----- | ----- | ----- |
| YP_002547516     | ----- | ----- | ----- | ----- | ----- | ----- | ----- | ----- | ----- | ----- | ----- | ----- | ----- | ----- |
| YP_003558208     | ----- | ----- | ----- | ----- | ----- | ----- | ----- | ----- | ----- | ----- | ----- | ----- | ----- | ----- |
| YP_777789        | ----- | ----- | ----- | ----- | ----- | ----- | ----- | ----- | ----- | ----- | ----- | ----- | ----- | ----- |
| YP_003749681     | ----- | ----- | ----- | ----- | ----- | ----- | ----- | ----- | ----- | ----- | ----- | ----- | ----- | ----- |
| YP_001715477     | ----- | ----- | ----- | ----- | ----- | ----- | ----- | ----- | ----- | ----- | ----- | ----- | ----- | ----- |
| YP_001083200     | ----- | ----- | ----- | ----- | ----- | ----- | ----- | ----- | ----- | ----- | ----- | ----- | ----- | ----- |
| YP_003734010     | ----- | ----- | ----- | ----- | ----- | ----- | ----- | ----- | ----- | ----- | ----- | ----- | ----- | ----- |
| YP_002911505     | ----- | ----- | ----- | ----- | ----- | ----- | ----- | ----- | ----- | ----- | ----- | ----- | ----- | ----- |
| YP_003978623     | ----- | ----- | ----- | ----- | ----- | ----- | ----- | ----- | ----- | ----- | ----- | ----- | ----- | ----- |
| YP_002947664     | ----- | ----- | ----- | ----- | ----- | ----- | ----- | ----- | ----- | ----- | ----- | ----- | ----- | ----- |
| YP_003750859     | ----- | ----- | ----- | ----- | ----- | ----- | ----- | ----- | ----- | ----- | ----- | ----- | ----- | ----- |
| NP_521406        | ----- | ----- | ----- | ----- | ----- | ----- | ----- | ----- | ----- | ----- | ----- | ----- | ----- | ----- |
| YP_003744152     | ----- | ----- | ----- | ----- | ----- | ----- | ----- | ----- | ----- | ----- | ----- | ----- | ----- | ----- |
| YP_001117674     | ----- | ----- | ----- | ----- | ----- | ----- | ----- | ----- | ----- | ----- | ----- | ----- | ----- | ----- |
| YP_623508        | ----- | ----- | ----- | ----- | ----- | ----- | ----- | ----- | ----- | ----- | ----- | ----- | ----- | ----- |
| YP_001583946     | ----- | ----- | ----- | ----- | ----- | ----- | ----- | ----- | ----- | ----- | ----- | ----- | ----- | ----- |
| YP_105961        | ----- | ----- | ----- | ----- | ----- | ----- | ----- | ----- | ----- | ----- | ----- | ----- | ----- | ----- |
| YP_002909041     | ----- | ----- | ----- | ----- | ----- | ----- | ----- | ----- | ----- | ----- | ----- | ----- | ----- | ----- |
| YP_002907673     | ----- | ----- | ----- | ----- | ----- | ----- | ----- | ----- | ----- | ----- | ----- | ----- | ----- | ----- |
| YP_003910271     | ----- | ----- | ----- | ----- | ----- | ----- | ----- | ----- | ----- | ----- | ----- | ----- | ----- | ----- |
| YP_001888024     | ----- | ----- | ----- | ----- | ----- | ----- | ----- | ----- | ----- | ----- | ----- | ----- | ----- | ----- |
| YP_003608086     | ----- | ----- | ----- | ----- | ----- | ----- | ----- | ----- | ----- | ----- | ----- | ----- | ----- | ----- |
| YP_001860599     | ----- | ----- | ----- | ----- | ----- | ----- | ----- | ----- | ----- | ----- | ----- | ----- | ----- | ----- |
| YP_003847232     | ----- | ----- | ----- | ----- | ----- | ----- | ----- | ----- | ----- | ----- | ----- | ----- | ----- | ----- |
| YP_001167907     | ----- | ----- | ----- | ----- | ----- | ----- | ----- | ----- | ----- | ----- | ----- | ----- | ----- | ----- |
| YP_001043640     | ----- | ----- | ----- | ----- | ----- | ----- | ----- | ----- | ----- | ----- | ----- | ----- | ----- | ----- |
| YP_001758389     | ----- | ----- | ----- | ----- | ----- | ----- | ----- | ----- | ----- | ----- | ----- | ----- | ----- | ----- |
| YP_486928        | ----- | ----- | ----- | ----- | ----- | ----- | ----- | ----- | ----- | ----- | ----- | ----- | ----- | ----- |
| YP_001603072     | ----- | ----- | ----- | ----- | ----- | ----- | ----- | ----- | ----- | ----- | ----- | ----- | ----- | ----- |
| YP_003262848     | ----- | ----- | ----- | ----- | ----- | ----- | ----- | ----- | ----- | ----- | ----- | ----- | ----- | ----- |
| YP_002911546     | ----- | ----- | ----- | ----- | ----- | ----- | ----- | ----- | ----- | ----- | ----- | ----- | ----- | ----- |
| YP_001815695     | ----- | ----- | ----- | ----- | ----- | ----- | ----- | ----- | ----- | ----- | ----- | ----- | ----- | ----- |
| YP_001115608     | ----- | ----- | ----- | ----- | ----- | ----- | ----- | ----- | ----- | ----- | ----- | ----- | ----- | ----- |

|              | 1                                                                                                                         | 10 | 20 | 30 | 40 | 50 | 60 | 70 | 80 | 90 | 100 | 110 | 120 | 125 |
|--------------|---------------------------------------------------------------------------------------------------------------------------|----|----|----|----|----|----|----|----|----|-----|-----|-----|-----|
| YP_002874841 | -----MLNWRNTRLPKL-EGENEITSVFEMVINQTYELGFOYCSFKMSSQ                                                                        |    |    |    |    |    |    |    |    |    |     |     |     |     |
| YP_001437405 | -----MKESDFFNWRREMTTRF-QEIQDSSDIYSLKKTETQNMEDYDFALCVRHP                                                                   |    |    |    |    |    |    |    |    |    |     |     |     |     |
| YP_003941366 | -----MRDIDFFSWRRDVLQKF-QLASSEEEIYSLQQQTEMLEWDYALCVRHP                                                                     |    |    |    |    |    |    |    |    |    |     |     |     |     |
| YP_003530769 | -----MTSENYFIWRADIKSAY-EKGGIDHITRLIEQQLRALDELDFYSLFIRHP                                                                   |    |    |    |    |    |    |    |    |    |     |     |     |     |
| YP_002649216 | -----MTSENYFIWRADIKSAY-EKGGGIVHITRIEQQLRELELDFYSLFIRHP                                                                    |    |    |    |    |    |    |    |    |    |     |     |     |     |
| YP_001908006 | -----MTSENYFIWRADLKSAY-DNGSGIAHITRVEQQLKELELDFYSLFIRHP                                                                    |    |    |    |    |    |    |    |    |    |     |     |     |     |
| YP_003519711 | -----MTSENYFSWRTETENHF-QALATTQQLKGLLDYIQLSGFDYFAFFIQHR                                                                    |    |    |    |    |    |    |    |    |    |     |     |     |     |
| YP_206883    | -----MNIKNINANE--KIIDKIKTCNNKNDINQCLSEIAKIIHCEYYLFAIYIP                                                                   |    |    |    |    |    |    |    |    |    |     |     |     |     |
| YP_001143989 | -----MYMFNDAIWEHIDRFTKAKTSEIQOQLERFSHQMGFDYFRLLIIFP                                                                       |    |    |    |    |    |    |    |    |    |     |     |     |     |
| YP_003267496 | -----MSSKRD-----EFDCVERIFNLPSDVDANEHAQSILQDTLATYGFDFP                                                                     |    |    |    |    |    |    |    |    |    |     |     |     |     |
| YP_003450678 | -----MPPSVVSVSDHTDPGCTLMGQEPPTAWEGGMROGKFRILSRSGRLPRQDSVLYCRFMSKDKSH                                                      |    |    |    |    |    |    |    |    |    |     |     |     |     |
| YP_002910942 | -----MTGGETSKASPSIRLGEDPSLAVLIEHLPAEIDCPFAY-----                                                                          |    |    |    |    |    |    |    |    |    |     |     |     |     |
| YP_001022984 | -----MLLGSFQSVLEARNRDEFRGEVVRFAKRLGFETVS-----                                                                             |    |    |    |    |    |    |    |    |    |     |     |     |     |
| YP_001898047 | -----MVSPLYTFEGLLTAGSHAETAAFMERHAGNLGYGRFFYSPLLVA                                                                         |    |    |    |    |    |    |    |    |    |     |     |     |     |
| YP_528967    | -----MEQLDYAELCSALCEATDEETLKEKLCFKCELVGFEFYIFGLISS                                                                        |    |    |    |    |    |    |    |    |    |     |     |     |     |
| YP_659944    | -----MMQVEEFYELLESVDESSSIDALKETCERFCQLIDIPFYLLGVIGQ                                                                       |    |    |    |    |    |    |    |    |    |     |     |     |     |
| YP_106048    | -----MFEGLSIGSFNEILNATCKKSLFEQTAYHVRQLGFKNFAYRQISG                                                                        |    |    |    |    |    |    |    |    |    |     |     |     |     |
| YP_106160    | -----MLSAALPESRDVRTLVETFRQAALQIQYQHHAIVELS-                                                                               |    |    |    |    |    |    |    |    |    |     |     |     |     |
| YP_001777917 | MAVIWRQATTLAFCTAHRASSETRATAIAMHCTTSNSNDARTATAPCSSARSSCERAPVDRVCQRGAGDTPVPSQLTSSLAGRWAPLATAFLNTVDLSLLKLFQDVSASLGFPPFAISRVS |    |    |    |    |    |    |    |    |    |     |     |     |     |
| YP_972129    | -----MILRDFIQRANQALTQTELLACFEQAVLLLYGQHFSLCYVQL                                                                           |    |    |    |    |    |    |    |    |    |     |     |     |     |
| YP_004012994 | -----MDRFATERFIEDANAAKSSKEVSALFGKALAVFGYDRYCYSLIT-                                                                        |    |    |    |    |    |    |    |    |    |     |     |     |     |
| NP_768520    | -----MPLASSRRESRGPDLFSFIECAIQTRSI AALFDLLVNFASNEGFDFKVAYGALSC                                                             |    |    |    |    |    |    |    |    |    |     |     |     |     |
| YP_567541    | -----MSADEGNQWRRALEFVDAADR-LDGPSLIRQFETHIASGFSAYIMAGLP-                                                                   |    |    |    |    |    |    |    |    |    |     |     |     |     |
| YP_484040    | -----MLAGESHLWRRALEFVDAADR-LDAPSLVRQFESHASAGFSAYIMAAP-                                                                    |    |    |    |    |    |    |    |    |    |     |     |     |     |
| YP_002966880 | -----MYDDCAARALDFVEGLDDCHDHDQVAHSVERILAEFGFEHFVITGLP-                                                                     |    |    |    |    |    |    |    |    |    |     |     |     |     |
| YP_781245    | -----MLTGDLTGDYGDALTFVEELSTLTTISAAIDFIEKGFCAYGFEITIVTGIP-                                                                 |    |    |    |    |    |    |    |    |    |     |     |     |     |
| YP_002495629 | -----MSGMEDFFLRETFALIDALDEVDRPFEAQTRIFEHIQHVGFSTFTIRLP-                                                                   |    |    |    |    |    |    |    |    |    |     |     |     |     |
| YP_001776815 | -----MAG--ALSIRQTAFDIVHRLRRAS'TD'VDVYSELRRSGAIFGYDVFLIAGLPR                                                               |    |    |    |    |    |    |    |    |    |     |     |     |     |
| YP_001641953 | -----MSR-----KSLDLTLEILKSLDRAHSREDILRAIMPRNLALGIEYVISAMIPL                                                                |    |    |    |    |    |    |    |    |    |     |     |     |     |
| YP_002497059 | -----MSS-----KSLDLSRELLQSIHRTATPENVRDQLLKKLAGVGEHVLLATLRI                                                                 |    |    |    |    |    |    |    |    |    |     |     |     |     |
| YP_001240084 | -----MEQYGFPCFAYLSFAP                                                                                                     |    |    |    |    |    |    |    |    |    |     |     |     |     |
| NP_106660    | -----MQLVFETLLEQLSLSVDEVDFHNALASAAGAFDIPAFAYLSLVS                                                                         |    |    |    |    |    |    |    |    |    |     |     |     |     |
| YP_003259225 | -----MSVFCSDNEIINNTIKTYLSRKLKQYGDLYKAYMIMNK                                                                               |    |    |    |    |    |    |    |    |    |     |     |     |     |
| YP_003017024 | -----MSVFCSDNEIINNTIKSYLGRKLKQYGDLYKAYMIMNK                                                                               |    |    |    |    |    |    |    |    |    |     |     |     |     |
| YP_003331714 | -----MSISFSNVDFINSTIQNYLNRKLKSYGDLKAYAYLIMNK                                                                              |    |    |    |    |    |    |    |    |    |     |     |     |     |
| YP_003885142 | -----MSISFSNVDFINSTIQSYLNRKLKSYGDKPYAYLIMNK                                                                               |    |    |    |    |    |    |    |    |    |     |     |     |     |
| YP_003002472 | -----MSISFSNVDFINSTIQNFIDRKLKSYGDLKAYAYLIMNK                                                                              |    |    |    |    |    |    |    |    |    |     |     |     |     |
| YP_002985768 | -----MVVSLPEVDFIRAAIQNHRLARNLQCYSGLYKAYAYLIMNK                                                                            |    |    |    |    |    |    |    |    |    |     |     |     |     |
| YP_001005891 | -----MIIDYFDNESINEDIKNYIQRRIKAYGDLRYSYLVMNK                                                                               |    |    |    |    |    |    |    |    |    |     |     |     |     |
| YP_003019697 | -----MSPLFTDSEIISRVIKKHFNKNLDRYDGIKFSFMVLNK                                                                               |    |    |    |    |    |    |    |    |    |     |     |     |     |
| YP_003261727 | -----MSQLFYNNETISRIKKSQFDMALSHYGDIKYAYMVLNK                                                                               |    |    |    |    |    |    |    |    |    |     |     |     |     |
| YP_002934275 | -----MFADNESLTREIKQFIDRSLVAYGHIQFAYALLNK                                                                                  |    |    |    |    |    |    |    |    |    |     |     |     |     |
| NP_670674    | -----MHSVFNRSNEVIETLRDYIDRKLTIYDSPRYTYMVINK                                                                               |    |    |    |    |    |    |    |    |    |     |     |     |     |
| YP_003520251 | -----MFSFFLENQITITDLQTYIQRKLSGSPPEYAYTVVSK                                                                                |    |    |    |    |    |    |    |    |    |     |     |     |     |
| YP_001906896 | -----MEPEDNINDIISKQLEAALSDELGEFIWAYVVLSK                                                                                  |    |    |    |    |    |    |    |    |    |     |     |     |     |
| YP_003941575 | -----MLKEYEENVDVIIKNQLETTLNTLGDLSWAYVVLSK                                                                                 |    |    |    |    |    |    |    |    |    |     |     |     |     |
| YP_003729882 | -----MKDYYNDQKINSLIKDELDAFFEDYQGVIIYAYAIMNK                                                                               |    |    |    |    |    |    |    |    |    |     |     |     |     |
| YP_002924396 | -----MFFKNELINKKVKYLEENMLKNHKNKFGYLVYIHK                                                                                  |    |    |    |    |    |    |    |    |    |     |     |     |     |
| YP_001832058 | -----MCAAKNGSALLKPTTLRSPASWAANASTENVAITQLLDLEANLSERTLEEFVFIQKY                                                            |    |    |    |    |    |    |    |    |    |     |     |     |     |
| YP_001669935 | -----                                                                                                                     |    |    |    |    |    |    |    |    |    |     |     |     |     |
| YP_001748729 | -----                                                                                                                     |    |    |    |    |    |    |    |    |    |     |     |     |     |

|              | 126   | 130    | 140            | 150           | 160          | 170        | 180     | 190       | 200    | 210     | 220    | 230          | 240               | 250           |                |             |             |           |        |
|--------------|-------|--------|----------------|---------------|--------------|------------|---------|-----------|--------|---------|--------|--------------|-------------------|---------------|----------------|-------------|-------------|-----------|--------|
| LasR         | ----- | LFGLLP | -----          | KDSQYENAFIVGN | YPAARE       | HYDRAGYARV | DFTV    | SHCTQSVLP | IFW    | PSIYQ   | TR     | -----        | KQHEFFEEASAAGL    | -VYGI         | TMPLHGARGELGAI | SL          | SVEAENRAEAN |           |        |
| YP_001747665 | L     | -----  | AAQAPKLYLYSN   | YPLAWI        | ERYQRDEFYK   | QDFA       | AALSHTS | TEPVLW    | TEDE   | LYSEAP  | -----  | DFREQACKHGL  | -RHGWT            | OSLHDLRHNETQV | S              | VARFPFKD    | IHE         |           |        |
| YP_001991323 | P     | -----  | GTSAKEQIANVLLH | QWPDV         | WRRYFSKGYIFT | DA         | AIRRVTS | SMVPPF    | S      | WTELEW  | -DH    | -----        | DSPAGHRILGEEAEFGL | -KEGHT        | VMVTL          | DGHSAGI     | S           | IAGAMTELP |        |
| YP_569310    | P     | -----  | GTSAKEQIANVLLH | QWPDV         | WRRYFSKGYIFT | DA         | AIRRVTS | SMVPPF    | S      | WTELEW  | -DH    | -----        | DSPAGHRILGEEAEFGL | -KEGHT        | VMVTL          | DGHSAGI     | S           | IAGAMTELP |        |
| YP_002232821 | L     | -----  | PLARPDQIVGN    | HPRWE         | HRYVKFGYVT   | ID         | IKRVAS  | QRPV      | WNA    | FDPEGDT | -----  | AFWHDAACFCGM | -RYGWS            | HGGYDRAGNLGVI | T              | LV          | RD          | TPLDADE   |        |
| YP_624828    | L     | -----  | PLARPDQIVGN    | HPRWE         | HRYVKFGYVT   | ID         | IKRVAS  | QRPV      | WNA    | FDPEGDT | -----  | AFWHDAACFCGM | -RYGWS            | HGGYDRAGNLGVI | T              | LV          | RD          | TPLDADE   |        |
| YP_002158591 | H     | -----  | SMVKS          | DISILD        | NYPKWR       | QYDDANLIK  | YD      | IVDYS     | NSNHSP | IN      | W      | IFENNA       | NAVNK             | KSP           | -----          | NVIEEAKISGL | -YSGFS      | FP        | IHTKDG |
| YP_002265247 | K     | -----  | TMIKSDIKILD    | NYPL          | WRNYDEANLIK  | YD         | IVDYS   | FSHHSP    | IN     | W       | IFENNA | NAVNK        | KSP               | -----         | NVIEEAKISGL    | -YSGFS      | FP          | IHTKDG    |        |
| YP_855658    | S     | -----  | TIQRPDV        | IIFN          | GCPOAV       | DTYTS      | SGFFA   | ID        | IVK    | CAMT    | KSTPI  | WAD          | VN                | DEER          | CDE            | Q           | REMMQLANE   | YGI       | -CDG   |
| YP_776923    | ----- | CYQEYR | -----          | MSGGTLK       | NCR          | TLN        | YPA     | WLS       | LYR    | DRAYL   | T      | D            | IA                | QHAL          | SS             | LMPL        | W           | DR        | I      |
| YP_002955225 | ----- | TSLAKL | SSD            | GAVES         | YELANIN      | Y          | PV      | W         | L      | QTY     | KE     | KN           | F                 | S             | G              | I           | D           | IV        | K      |
| YP_002537872 | ----- | VFGIA  | QIG            | TNGLI         | QTY          | D          | V       | M         | N      | I       | S      | Y            | P                 | E             | W              | L           | I           | T         | Y      |
| YP_002871035 | ----- | LLSLGP | -----          | STHDP         | FN           | R          | I       | M         | T      | Y       | P      | S            | D                 | W             | L              | K           | R           | Y         | K      |
| NP_106527    | A     | -----  | QKVLK          | PAQ           | ADSAI        | M          | L       | N         | Y      | P       | N      | W            | K                 | E             | R              | Y           | F           | K         | M      |
| YP_001242900 | ----- | APGQ   | S              | L             | Q            | H          | T       | L         | A      | N       | G      | W            | P                 | S             | E              | F           | D           | L         | Y      |
| YP_001203095 | ----- | APGQ   | S              | L             | Q            | H          | T       | L         | A      | N       | G      | W            | P                 | S             | E              | F           | D           | L         | Y      |
| YP_001927660 | K     | -----  | RLPART         | Q             | K            | N          | F       | I         | E      | N       | T      | S            | D                 | E             | W              | R           | L           | Y         | F      |
| YP_002547516 | PV    | -----  | LNAT           | N             | E            | R          | H       | T         | F      | G       | I      | N            | N                 | Y             | P              | E           | W           | R         | Y      |
| YP_003558208 | HSIN  | -----  | I              | E             | R            | V          | V       | S         | S      | G       | F      | G            | F                 | E             | A              | K           | S           | A         | H      |
| YP_777789    | W     | -----  | PLSR           | K             | V            | L          | V       | F         | S      | N       | F      | P            | E                 | E             | W              | R           | R           | Y         | F      |
| YP_003749681 | L     | -----  | PLSE           | P             | K            | I          | L       | L         | N      | N       | Y      | P            | O                 | A             | W              | R           | E           | R         | Y      |
| YP_001715477 | L     | -----  | SI             | A             | E            | P          | K       | T         | I      | M       | L      | N            | N                 | Y             | P              | E           | A           | W         | K      |
| YP_001083200 | L     | -----  | SI             | A             | E            | P          | K       | T         | I      | M       | L      | N            | N                 | Y             | P              | E           | A           | W         | K      |
| YP_003734010 | L     | -----  | SI             | A             | E            | P          | K       | T         | I      | M       | L      | N            | N                 | Y             | P              | E           | A           | W         | K      |
| YP_002911503 | W     | -----  | PV             | S             | R            | P          | K       | I         | L      | L       | N      | N            | Y                 | P             | O              | A           | W           | R         | Y      |
| YP_003978623 | ----- | P      | T              | N             | P            | Q          | F       | M         | S      | I       | D      | Y            | P                 | I             | A              | W           | Q           | E         | R      |
| YP_002947664 | V     | -----  | P              | T             | R            | P          | K       | L         | V      | M       | S      | T            | Y                 | D             | E              | R           | S           | R         | Y      |
| YP_003750859 | L     | -----  | PV             | S             | K            | P          | A       | V         | A      | I       | F      | D            | T                 | Y             | P              | A           | Q           | W         | H      |
| NP_521406    | L     | -----  | PV             | S             | K            | P          | A       | V         | A      | I       | F      | D            | T                 | Y             | P              | A           | Q           | W         | H      |
| YP_003744152 | L     | -----  | PV             | S             | K            | P          | A       | V         | A      | I       | F      | D            | T                 | Y             | P              | A           | Q           | W         | H      |
| YP_001117674 | L     | -----  | PV             | S             | K            | P          | A       | V         | A      | I       | F      | D            | T                 | Y             | P              | A           | Q           | W         | H      |
| YP_623508    | L     | -----  | PV             | S             | K            | P          | A       | V         | A      | I       | F      | D            | T                 | Y             | P              | A           | Q           | W         | H      |
| YP_001583946 | L     | -----  | PV             | S             | K            | P          | A       | V         | A      | I       | F      | D            | T                 | Y             | P              | A           | Q           | W         | H      |
| YP_105961    | L     | -----  | P              | I             | S            | K          | P       | V         | V      | A       | I      | F            | D                 | T             | Y              | P           | N           | G         | W      |
| YP_002909041 | Q     | -----  | P              | G             | S            | Q          | L       | V         | E      | I       | F      | D            | T                 | Y             | P              | Q           | W           | H         | A      |
| YP_002907673 | L     | -----  | P              | V             | G            | E          | S       | V         | K      | V       | F      | D            | N                 | Y             | P              | E           | W           | R         | Y      |
| YP_003910271 | ----- | LI     | AM             | L             | P            | -----      | R       | P         | T      | M       | R      | E            | D                 | A             | Y              | I           | R           | S         | T      |
| YP_001888024 | ----- | LI     | AM             | L             | P            | -----      | R       | P         | T      | M       | R      | E            | D                 | A             | Y              | I           | R           | S         | T      |
| YP_003608086 | ----- | LV     | AM             | L             | P            | -----      | R       | P         | T      | M       | R      | E            | D                 | A             | Y              | I           | R           | S         | T      |
| YP_001860599 | ----- | LV     | AM             | L             | P            | -----      | R       | P         | T      | M       | R      | E            | D                 | A             | Y              | I           | R           | S         | T      |
| YP_003847232 | ----- | RL     | AI             | L             | P            | -----      | D       | P         | R      | AP      | I      | E            | A                 | E             | H              | A           | F           | Q         | S      |
| YP_001167907 | ----- | Y      | A              | T             | T            | S          | P       | -----     | T      | G       | A      | V            | Q                 | G             | Y              | A           | N           | Y         | P      |
| YP_001043640 | ----- | Y      | A              | T             | T            | S          | P       | -----     | T      | G       | A      | V            | Q                 | G             | Y              | A           | N           | Y         | P      |
| YP_001758389 | P     | -----  | GL             | P             | K            | R          | R       | H         | A      | G       | F      | V            | L                 | A             | S              | T           | M           | P         | E      |
| YP_486928    | P     | -----  | RT             | S             | V            | K          | Q       | I         | A      | N       | V      | L            | H                 | R             | W              | L           | P           | L         | S      |
| YP_001603072 | ----- | G      | A              | P             | N            | A          | E       | T         | A      | L       | V      | Y            | P                 | D             | A              | L           | K           | H         | Y      |
| YP_003262848 | L     | -----  | N              | I             | T            | N          | Q       | V         | M      | M       | N      | N            | Y                 | S             | O              | N           | W           | K         | R      |
| YP_002911546 | L     | -----  | P              | L             | S            | N          | P       | P         | S      | L       | T      | V            | S                 | N             | Y              | P           | A           | W         | Q      |
| YP_001815695 | I     | -----  | P              | I             | T            | R          | P       | A         | I      | M       | G      | W            | S                 | N             | Y              | P           | E           | A         | W      |
| YP_001115608 | I     | -----  | P              | I             | T            | R          | P       | A         | S      | M       | E      | W            | N                 | N             | Y              | P           | O           | A         | W      |

126 130 140 150 160 170 180 190 200 210 220 230 240 250  
YP\_002874841 V-----SENQTNPIEFTNYPKHWTFFVYNOARYFDVDDVYKHCKRCVLPVWEGTLPKADAP-----SLWSLAQTLNV-NVAWTOAVHDFQGVFMSMLTLRGTDDVSPVPE  
YP\_001437405 V-----PFRPKLTLHTTYPEAWLHEHYQAEINYVYIDVLPKPNANYLVGPLSWNDALFAGAAE-----ELWNAARDHGL-KVGVTOCVIAPNRAQGFLSYVSGTSPRGSMA  
YP\_003941366 V-----PFRPKIALQTYTPRAWIAQYQAEINYFTIDVLPKPNYRHGYLEWDRLEFD-----EFWDAARDHGL-RKGVTOCLILPNRALGFLSYVSGTSPRGSMA  
YP\_003530769 V-----PFRPKTFLYSNYPQWLWHYWRGEFYQLDVLKMCSSSPGKIWLWDDKTIIS-AGL-----EFWEHARNYGI-FHGISCSVMSASNRVAVGIIISGSKRPFTTGSR  
YP\_002649216 V-----PFRPKTFLYSNYPEDWLEHYFREDFYQLDVLKMCSSSPGKIWLWDDKTIIS-SGV-----RVFENARNYGI-FHGISCSVMSASNRVAVGIIISGSKRPFTTGSR  
YP\_001908006 V-----PFRPKTFLYSNYPQWLWHYWRGEFYQLDVLKMCSSSPGKIWLWDDKTIIS-SGV-----RVFDDARIHGI-YHGISCSVMSASNRVAVGIIISGSKRPFTTGSR  
YP\_003519711 V-----PFRPRVYLHDTYPKLWIKWIKRYEQNYAIDVVLQCLRSRSGKGVHWTPPELFS-SAK-----EMWQDACNFGL-LSGFSCSAMASNRVAVGIIISGSKRPFTTGSR  
YP\_206883 H-----SIIKPDVSIIDNYPEKRWKRYDDAGLLEYDWDYDKSHHSPINWVFKKTIKKESP--NVIKEAQESGL-ITGFSPPIHTASNGFGMISFAHSDKD-IYTD  
YP\_001143989 I-----SMQKSHVALFNKCPSTWFPEAYSERHYLTDVVFVFLGLKQTOPIRWKLDLDCSPWLPSASREVNMNLAADFVGRNGVSPPLHTPQGEHGIIISFISEKKSNDLDM  
YP\_003267496 -----CFAIYGAPRGAIAIDNYHLLLNAYPNAWADRYYEKHYWYSDVLAHCGRSPTPIDWTTVONQPAQP-ASAEQVMREAEHEDL-CSGVTTVTRDVSGRGLGIIISLATRDVYSAELR  
YP\_003450678 FLSRIIDSVGPFNVYFTGTCTSSDRHVNLLTITSEKWRMRYFDRRYENIDVLSAARRATPVVDWDLKFDSDG-----VEDFIADALCYGIRLQGVTFSLRDMHQRLAIVISLQSNDDPAVWRV  
YP\_002910942 -----VMIDKNS---LELGCFLSSYPIHLOQEYRRRALHRVDVYLHAIQSVAPFSWAEAFRQQRVPD---PSEFDALRREFGLHDGYVTFVHDHPYQYVGMISFFNRG-GRPEFR  
YP\_001022984 -----AITVVDHPVGDTEFVAIDNADDAYKDAIEDPKAGQIDVMOHCKROSVPPIWOSTYVVSAGO-----GSMWEAQARFGFRGTGICLALHMPGRRHFVIGVDRDQ-ALPKDR  
YP\_001898047 GDARHFFK-----DDHNVAEEMLYTKNIFSTYPAWIRRYQEAGHVAADVVKLITTSNLPITHWDA-----DDLQAARSPVDFEAREHGL-ATGITPPIHNGFDHTRALFSVTSQAPERSQR  
YP\_528967 -----ASSLSPTTISTISNYPDFWKNYFEEGMQRHDDVRYCMQNTSAIKWRQLMDLEHYVDIAIEKIMIRASESGL-CDGLSIPKAPSGEIAIFSLASNR-EEGLNQ  
YP\_659944 -----TSSYS-PTIRVISNYPEKLEFYFKESEQNDVVKYIFEKQSPIRWDLKVEVDQFSSTKGLLVFEKAAAYGL-YNGISIPIRSTSENIAVFSVAIDE-RSDANR  
YP\_106048 -----AASSR---CMLDGFPAWRRLRYDAADYLSIDVYQHCRCRTVPLIWHD---DLWTTSRAKLRMRDEAKSYGL-VYGISCPVHDRSGAISMSMATDPPFEHDAS  
YP\_106160 -----GASHPAS-IDVVS LHYSEWVEHYTRNDYFADVHRAAFRYSTPFSWNVDA-TA---NLRRERHLLMEAEADAGL-DNGISIPPLHQPLGRVLLVLSLGS-TAPTHDAD  
YP\_001777917 RH-----AGNGRAMS-VETLCARYPDHVVHAYARDYGPVDVVRMAFARATPYRWAIDR-GL---NRIEQRVLGEARDAGL-TSGVSIPLREANGDILLVNLAS-PSPEIKTE  
YP\_972129 RQ-----DGGSTSPPIGVLSHNYPSFVSHYIARNYLEDVVRHAPQAMSPYKWDVVS-AQ---GDREAHIMDEATDAGL-ADGIGLPIHEPGGRIFLATYASHQQLTLGND  
YP\_004012994 -----DHPSLGLNAGHGLVCNYPDDWMEHYLRNLYEKKIDVPOYGISASRPPTWASVV-AQRKWHPDQMKVMHEAEEARL-CDGIAVPCVGVNGLAGEGIIASSHGGVSPDR  
NP\_768520 S-----NERRLPEYLPPPTTIFPSSWCQRYAEQEQYQADVVRRTAMLPRPPIWDELTI-SRYELQAPRELRLVREAKEAGL-KHGMISVPLFGSQGRSAFVSFASPFDDADP-Q  
YP\_567541 -----SPGAGLADLLFANGWPRGWFELYVGRNYMAVDVPRHGAATVQPFVSDAP-YDRKRDRAAHQVMTDAAEFGL-VRGYCIPLHYDDG-GAMISMAGEAPDLDPPTA  
YP\_484040 -----APGAGLAELTLANGWPRGWFELYVGRNYMAVDVPRHGAATVQPFVSDAP-YDRKRDRAAHQVMTDAAEFGL-VRGYCIPLHYDDG-GAMISMAGEAPDLDPPTA  
YP\_002966880 -----NPNDRLDQVLLIRRLPAGWFELYARHNYMYLDDVFRNCRATSPFPWGEAF-YDPETEPGAIEVMQRATDFGM-ARGHVSPIHHPGEGCEAFSMSGRNPDLTGRT  
YP\_781245 -----NHKQFSQMVMAKRWDEWFKLYTQNNYHRDDVVRHLRKSFNPFVSDAP-YDRKRDRAAHQVMTDAAEFGL-VRGYCIPLHYDDG-GAMISMAGEAPDLDPPTA  
YP\_002495629 -----RPSDRLGNMIFNMWPKDWLPHYDRVGHYRFDVVRQCYRTPTEPFVSDAP-YDRKRDRAAHQVMTDAAEFGL-VRGYCIPLHYDDG-GAMISMAGEAPDLDPPTA  
YP\_001776815 -----APHENLYDCSLISGWPPHWRGRYQERRHMHVDVVRHIRIRGTTPDFLWQEA-VDAQVTPEGMVMVEEARAFSL-NEGHCVPFPHQDGTGAEVSGFSGGQVRLSQDE  
YP\_001641953 K-----RLPARTQKNYLILENTSDEWNRLYFSKGYMYTDDVVOATLSSTTGFVWSEIE-PAGVLDPRSQRVMNEAGEFGL-GDGFITPLATLEEERGGITFAGPQLDISPGQ  
YP\_002497059 C-----DAVPCDRRPTVFIGTYDWARRYARNYLHDDVVRGVAERASGFATDDP-LIASDDREARRVLEDEAGEFGL-HEGTLPLLLTLEGGTAGVSVFVGERLDLSPAV  
YP\_001240084 R-----GDEDDALAITITPYSAWVEQYRANRYDRIDVVIARSVATTLPPFAWSTDC--FDALNNRQKWFLLEAESEFEI-RHGVITPIHDROGKVATIILAACEARSAFEA  
NP\_106660 -----DRVTKPRLLISNYSWGTSHYLRHQYERIDVVIEWARCSECPFWGPGI-GHAGISTRQQLFDEAAEFGI-CCGITPLVDRRGGVAAMTFADRLDPTFLR  
YP\_003259225 K-----NPSQVVIISNYPQWVNTYKKNYQHIDVILTAINKVSPFSEWEDNIVNSKL--KFSKIFNLSKEYDI-VNGYTFVLHDDNNLNLAALSIMFEEHSPTDIE  
YP\_003017024 K-----NPSQVVIISNYPQWVNTYKKNYQHIDVILTAINKVSPFSEWEDNIVNSKL--KFSKIFNLSKEYDI-VNGYTFVLHDDNNLNLAALSIMFEEHSPTDIE  
YP\_003331714 K-----KPTDVVVIISNYPSEWVEIYRNNNYQHIDVILTAINKVSPFSEWEDNIVNSKL--KFSKIFNLSKEYDI-VNGYTFVLHDPANNLTIISFMFEENRSGELE  
YP\_003885142 K-----KPTDVVVIISNYPTEWVFIYRNNNYQHIDVILTAINKVSPFSEWEDNIVNSKL--KFSKIFNLSKEYDI-VNGYTFVLHDPANNLTIISFMFEENRSGELE  
YP\_003002472 K-----KPTDVVVIISNYPTEWVFIYRNNNYQHIDVILTAINKVSPFSEWEDNIVNSKL--KFSKIFNLSKEYDI-VNGYTFVLHDPANNLTIISFMFEENRSGELE  
YP\_002985768 R-----FPTDMVIISNYPSEWVNTYKKNYNSIDVILTAINKVSPFSEWEDNIVNSKL--KFSKIFNLSKEYDI-VNGYTFVLHDPANNLTIISFMFEENRSGELE  
YP\_001005891 K-----TPLHPTIISNYPDLWVKYKKNYSYHLIDVILTAINKVSPFSEWEDNIVNSKL--KFSKIFNLSKEYDI-VNGYTFVLHDPANNLTIISFMFEENRSGELE  
YP\_003019697 K-----NPSQMIISNYPDEWVNVLYKENKYQHIDVILTAINKVSPFSEWEDNIVNSKL--KFSKIFNLSKEYDI-VNGYTFVLHDPANNLTIISFMFEENRSGELE  
YP\_003261727 K-----KPTTEILIISNHHDEWREIYQANNYQHIDVILTAINKVSPFSEWEDNIVNSKL--KFSKIFNLSKEYDI-VNGYTFVLHDPANNLTIISFMFEENRSGELE  
YP\_002934275 K-----NPSDIIISNYPDEWVNTYKKNYNSIDVILTAINKVSPFSEWEDNIVNSKL--KFSKIFNLSKEYDI-VNGYTFVLHDPANNLTIISFMFEENRSGELE  
NP\_670674 -----NPGDIFIVTSPNWAELIYNNYQHIDVILTAINKVSPFSEWEDNIVNSKL--KFSKIFNLSKEYDI-VNGYTFVLHDPANNLTIISFMFEENRSGELE  
YP\_003520251 K-----NPSNVLIISSYPDEWVLYRANNFQITDVIITAFKRTSPFADENITMSDL--RFTKIFSLSKQYNI-VNGYTFVLHDPANNLTIISFMFEENRSGELE  
YP\_001906896 K-----DMSCIFGVNTYPSGHWKQYREKGLQYTDVITSLNRLTPFAWENITLMSDL--RFTKIFSLSKQYNI-VNGYTFVLHDPANNLTIISFMFEENRSGELE  
YP\_003941575 K-----DMSCIFGVNTYPSGHWKQYREKGLQYTDVITSLNRLTPFAWENITLMSDL--RFTKIFSLSKQYNI-VNGYTFVLHDPANNLTIISFMFEENRSGELE  
YP\_003729882 K-----DPSQMQIINNMP-AWFDVYLERKYQFIDVVIIRGLRCVEDYEWENEVILSEGY--NLTRIFNESFYQNI-YRGTTFPLHDYLNLLVVISV-IGK---KEFD  
YP\_002924396 K-----DFHHICIIISNCP-EWFDIYLEFNHQLIDVVIKALSVEDYEWENEVILSEGY--NLTRIFNESFYQNI-YRGTTFPLHDYLNLLVVISV-IGK---KEFD  
YP\_001832058 YELKN-----IFYICPSLPGRTITDPTYILGTYSQEWIHYRERNYVNLDDVIVNGARSLLPIDWAKLRPSPK---IQKFFGEATDFGVGRQGLTIPVRGPTNLWALFCMTTDDTQAEWQ  
YP\_001669935 -----  
YP\_001748729 -----



```

251      260      270      280      290      300      310      320      330      340      350      360      370      376
LasR    RFMESVLPFLWMLKDYALQSGAGLA-----FEHP-VSKPVVLTSTREKEVLQWCAIGKTSWEISVINCSEANVNFMHGNIRRRKFGVTSRRVAAIMAVNLGLITL-----
YP_001747665 L--YDKAGVQVQLCHTLHDTICEHH-----LAKLSS--PLKMSDRELEVWKWSAAGKTAADVACILSLSQSTVNFHIRSVITKTASNKAGAVA IAMMRGLIDQ-----
YP_001991323 RGPVQMMAIYSFARAHLRERP-----PAPVTLTIREADVHLHWIAEAGKTDWEIARILQVSEHLVDKVARQIKSKFQVNVNRVQAVVQAMRAGVIH-----
YP_569310   RGPVQMMAIYSFARAHLRERP-----PAPVTLTIREADVHLHWIAEAGKTDWEIARILQVSEHLVDKVARQIKSKFQVNVNRVQAVVQAMRAGVIH-----
YP_002232821 I--SRLRAPCASLSHAAHAYLMPRL-----ADPIAPVGTG-LTLREREVLAWTADGKTAYEIGMIFGIAERTVKFHLQNAVVKLDAMNKTHAATKAAMLGGLP-----
YP_624828   I--SRLRAPCASLAHAHAYLMPRL-----ADPIAPVGTG-LTLREREVLAWTADGKTAYEIGMIFGIAERTVKFHLQNAVVKLDAMNKTHAATKAAMLGGLP-----
YP_002158591 S--LFLHACMNPI LIVPSLVDNYRK-----INIANNKSNNDLTKREKECLAWACEGKSSWDISKILGCSERTVTFHLTNAQMKLNTNRCQISKAILTGAIDCPYFKN-----
YP_002265247 N--LFLNACMSVPLILPELLDSNQR-----ITKEDQOVHTKLTREKECELIWSCEGKSRWEISKILGCSERTVTFHLANSQKLGANNRCQISKAILTRAMNPLY-----
YP_855658   L--SAVVPFI SWLSMHIFEAVARVCL-----AG---LSPHDALSLRELEVCRWAAEGKQVSDIAQILGIPRTVTFHLNNAVSKLGASSKQAI SWALKQCMQVRLNEMALVANVDEKQ-----
YP_776923   MPCDVPS-WGALVANMLDACCRRLE-----AVQSDAPCLS--TRELEILKWAEBGKSTWDI SRIVSLTEHGVLHHRISIMKKFDVPTRRQAVLMASRFGLL-----
YP_002955225 KYDPTVIAILOTIVPHLHLASSRII-----ESRLIQHNKLLSGREREVLSWLHGKSSWDISTILQISECTVNYHIYNI IKKLDVQNRPAQAVAVATHLGLDDP-----
YP_002537872 N--HPREKFI IENLTPHLHTAFTTYL-----SKTKAPVN-FELSKREIEVLNWWKGGKSSWDISVILAI SVRTVKFHVENIMVKNLNAVSRTHAVAILASAGVIDID-----
YP_002871035 DDNLGPLGMLFMLIPFLLEGSQKHL-----KTVG--EPPSSLTLRESEVLKWTGVGKTTWEMSCILGCSERTINFHIANASRKLGSFSRRQAVGVALAQGLISL-----
YP_001242900 RTVTYQLAALHFHVRVTKGT-----SNA-LKQVQDLSLREKECLLWIARGKSSWEI GKILGISGNTVNFHLKNAMRKLDTASRTVAAIKATSLGIVEV-----
YP_001203095 RGALHLISIFTH-SRLRALARATSG-----G-----QSRRLSRIEAEVLSWAARGKTAWETARILGVSENRVNRWHLEEAQRKLETKNKTATVATALVNGEITI-----
YP_001220765 RGALHLISIFTH-SRLRALARATAG-----N-----PGRRLSRIEAEVLSWAARGKTAWETARILGVSENRVNRWHLEEAQRKLETKNKTATVATALVNGEISI-----
YP_001927660 RGMFLTIASVYVVGQTLLIDNGPSE-----RRMG-LTPRERESLQWVAEGKTDWEI GELMGISRHGVDFHLRSARVKGCVSRVQAVAEGRFRGLIV-----
YP_002547516 EAHLIHIISQFFHSCALPVVMEEHL-----IGSY-RRRRSFLSAREKETVIWVSKGKSSWEIAKILGISSEKSVFYMESVKKRLEAVNRTQAVVKAIMLGLIQTDRFQSGDGRKATMAMPSRA-----
YP_003558208 Q-----LATLELINTVSAQAMTRLT-----NPVEELTKREREILAWSSEGKSSWEIGMICSITERTVKFHLKNIYKKNLVQNRAQAI VCAIROGLI-----
YP_777789   L--QQEELKMRWLVNAAHLAITRAV-----LPKLSPEGDIELTDREVEVLKWAADGKTAESAEMILISVYTVNFHVKNVADGFKLNTSNATAAVARAAMLGLLI-----
YP_003749681 L--ADNTRRMQWLTHMAHLALSRL-----RADLAGDSDSLTGREVEVMKWTADGKSAQDIADILAI SKNTVDFHVKNNAVKKLQAVNKTAAVRAAMLGYLF-----
YP_001715477 Q--KAQYTNMYWLTQTVHSSIAKIV-----NDVEFAKFNLYLTNREKEALRWTAEGKTSAEIAQILGVTERTVNFHLSNSMQKLVNWNKI SAAIRAVMLGLL-----
YP_001083200 Q--KAQYTNMYWLTQTVHSSIAKIV-----NDVEFAKFNLYLTNREKEALRWTAEGKTSAEIAQILGVTERTVNFHLSNSMQKLVNWNKI SAAIRAVMLGLL-----
YP_003734010 Q--KAQYTNMFWSLQTVHSSIAKIV-----NETEFAQFNLYLTNREKEALRWTAEGKTSAEIAQILGVTERTVNFHLSNSMQKLVNWNKI SAAIRAVMLGIL-----
YP_002911505 L--ERNEFRMRWLVTTHLAMTRVL-----MPKLPMPDTERGLTDREVEVLKWAADGKTSAGEISTILRISVDTVNFHVKNNAVAKLKT VNKTSAVVRAAMLGLLS-----
YP_003978623 L--LSKELRMRWLVTAAHLAFSKVL-----LPRFKLAPNVPLTRRETEILKWAADGKTSDDVSEI LAIAESTVRFHTKNAISKLGARNRTAAVARAALLGLLS-----
YP_002947664 M--RAKDLLFQGLVKNKAHAFRCRL-----GGPLAG--IEPLTKRQVEVLRWTDGKTSDEIAAAILCISKPTVDFHLRNAMARLGATKSSAAAFASRLGLLN-----
YP_003750859 L--DRLSATTNWLANLAHTLMS PFL-----MPKLVPESSNAVLTAREREVL CWTGEGKTAYEIGQILRISERTVNFHVNNVLLKLAATNKVQAVVKAIVIGLI-----
NP_521406   L--EQLSATTNWLANLAHALMS PFL-----MPKLVPESSAALTAREREVL CWTGEGKTAYEIGQILRISERTVNFHVNNVLLKLAATNKVQAVVKAIAIAGLI-----
YP_003744152 L--GQLSIATHWLANLAHTLMS PFL-----VPKLVPESSNAVLTAREREVL CWTGEGKTAYEIGQILRISERTVNFHVNNVLLKLAATNKVQAVVKAIAIATGLI-----
YP_001117674 I--NMLTLQTNWLANLSHSLMSRFM-----LPKLSPAAGVTLTAREREVL CWTGEGKTACEIGQILSISERTVNFHVNNILEKLAATNKVQAVVKAIAAGLIDTP-----
YP_623508   I--NMLTLQTNWLANLSHSLMSRFM-----VPKLSPAAGVTLTAREREVL CWTGEGKTACEIGQILSISERTVNFHVNNILEKLGATNKVQAVVKAISAGLIETP-----
YP_001583946 I--NMLTLQTNWLANLSHSLMSRFM-----VPKLSPEARVALTAREREVL CWTGEGKTACEIGQILSISERTVNFHVNNILEKLGATNKVQAVVKAISAGLIDTP-----
YP_105961   I--NHLTLQANWLANMSHSLMSRF-----VPKLAPESGVALTHREREVL CWTGEGKTACEIGQILSISERTVNFHVNNILDKLGATNKVQAVVKAIAMGLIDAP-----
YP_002909041 I--NSLTLQANWLANLSHSLMGRFL-----VPKLSPAASISLTKREREVL SWTSEGRTASEIGEQLNISERTVTFPHINNILAKLGAANKVQAVVKAIGMGLIQAP-----
YP_002907673 L--KRLSLQLSWITNAVHSAMTAHV-----FDSLGLGAAISLTEREQVLRWTEGLNADFISEKLNISVSTVNWHIGKVLAKFGATNKVQAAARAVALNLL-----
YP_003910271 RHIDVVL PNLVLLRDLVIDTSQRHL-----HTHAQSLLPK-LTPRERECLQWTARGKSTWEI SHILNCSEAVNVFMHKNIRTKLGVNSRRAAAVIATQLGLIDPG-----
YP_001888024 RHINVALPNLVLLRDLVIDTSQRHL-----NTHAQTL LPK-LTPRERECLKWTARGKSTWEI SHILNCSEAVNVFMHKNIRTKFVNSRRAAAVIAAQLGLIDPG-----
YP_003608086 RHNVAALPNLVLLRDLVIDTSKQHL-----DSHAQSLMPK-LTPRERECLKWTARGKSTWEI SHILSCSEAVNVFMHKNIRAKFGVNSRRAAAVIAAQLGLIDPG-----
YP_001860599 RHLDVVL PNLVLLRDLVIDTSQPHL-----NHTQALVPK-LTPRERECLKWTARGKSTWEI SHILNCSEAVNVFHLKNIRTKFVNSRRAAAVIATQLGLIDPG-----
YP_003847232 RDANHHLP ELACFRDFILESSLQFM-----KPSRQVENPISVTHRELECKLWASAGKSSWEIGHILNCTEATVNFHFSNIRRKFFSTSRQQAIVKAI SLGLIHPN-----
YP_001167907 KLKRAAIGDLQVAAVHLHDVAMRSD-----VISR-ALRQPRLSTREIEVLQWVAAGKSQMDIGDILGISHRTVEVHLRSAREKGLTSTVQAVGRAIGLGLVYPR-----
YP_001043640 KHKRAVIGELQVAAVHLHDVAMRSD-----VISR-ALRQPRLSTREIEVLQWVAAGKSQTDIGDILGISHRTVEVHLRSAREKGLTSTVQAVGRAIGLGLVYPR-----
YP_001758389 RVAVNLVATYAVGQLL MNSRPAA-----PAPARLSPREREALQWAAEGKTDVEIGMVMGITAGVVDYHLRSARAKLDTVNRHTVAQALRSGLIT-----
YP_486928   RGMVQLVAMYAFLRSLKLGKPK-----TPAITLTKREADVHLHWIAEAGKTDWEISKILRVSEHLVDKMARQIRTKLGAVNRIQAVALAMRSGIIR-----
YP_001603072 LVALGFINSQYYET--LSKLSEAE-----PG-----PVPTFSRREKECLLWVSRGKTTWEDISVILGISENTINAYLKNVILKLGCSGRQAVLRAIDLNLISP-----
YP_003262848 L--KELQYRLTWLTQISHHCMEII-----TTKKMPETMITLTMREKVDLRTWTAAGKTSGETSTIMNITERTVNFHIANSMQKLNCKINKTSATVRAAMLGLLD-----
YP_002911546 R--DRNEFI VHWLANVAHAALAPFL-----P--AAGEPEANLTSRETDV LKWTADGKTAYEISRLSISESTVNFHVKNIMSKLGTSTNKI QAVAKAALTGML-----
YP_001815695 L--RRTEPEMIWFCQFVHATMSNLI-----VSDVMPGAMRSLREKEVLHWTAEAGKTAEEVAAILQLTERNVGFHIQNAIDKLDANKTHATVKAAMGLIPVRC-----
YP_001115608 L--RRTEPEMIWLCQFVHATMSNLI-----VSDVMPGAMRSLREKEVLHWTAEAGKTAEEVAAILQLTERNVGFHIQNAIDKLDANKTHATVKAAMGLIPVRC-----

```

251 | 260 | 270 | 280 | 290 | 300 | 310 | 320 | 330 | 340 | 350 | 360 | 370 | 376

YP\_002874841 | L--YEKAGHVWLWCHAMHAVVAQKY-----AGKPSALPPSKLTPRETEILKWSAMGKTASDIATILCLSSERTVGFHISSTFFKGLGVNKKIAAVLCASKAGLF-----

YP\_001437405 | D--DELALRLQHLVEQSLVTMMRLE-----DPAATVL--EMKLSKREKEILQWTAEGKTSAEIAIILSISENTVNFHQKNMQKFFNAPNKTQIACYAAAIIGLI-----

YP\_003941366 | E--DETQMRLOMLAEFSTTALLRLD-----DSAILTP--EMKFSKRELEILKWTAEAGKTSAEIISILSISENTVNFHQKNMQKFFNAPNKTQIACYAVATGLI-----

YP\_0030530769 | T--TETELKIQYVLEAEGSMAALININ-----DISMATT--KLFDSKRELEILKWTAEAGKTSAEIISILSISENTVNFHQKNMQKFFNAPNKTQIASYAAAIIGLI-----

YP\_002649216 | T--PVMELKIQYISELSMASLIKIN-----DISMATT--KLDLSQRELEILKWTAEAGKTSAEIISILSISENTVNFHQKNMQKFFNAPNKTQIASYAAAIIGLI-----

YP\_001908006 | T--PEIEELKIQYISELTMAALIDIN-----DISMATT--KLDLSERELEVLKWTAEAGKTSAEIISILSISENTVNFHQKNMQKFFNAPNKTQIASYAAAIIGLI-----

YP\_003519711 | R--VELEVKLHFLAEQSLSLERLN-----DEALMVQ--GNDFSQRELEILRWTAEGKTSQEISLILSISEHTVNFYQKNMKKRFNVSNKTQIACYAAAIIGLI-----

YP\_0206883 | S--LFLHASTNVPLMLPSLVDNYQK-----INTTRKKSIDSILTKREKECLAWASEGKSTWDISKILGCSERTVTFHLLTNTQMKLNTNRCQSIKAILTGAINCPYLKN-----

YP\_001143989 | F--ENVPLLSFCASYIFNSALQLIK-----SRPDLMKHHLTELSDRKECLFWASEGKTSWEIATILGISERTVNFHLLNQVNTKTDKSNRNRQAIKSISSGIIVPSLDDVTTITNLRLS-----

YP\_003267496 | DRIRHAIPIAQFVLSHLVEKLEAHF-----HVRLEDLQRYKLSERERECLRWAAGKTSWEIGHILGIAERTAI FHLNNAMKKGAVNRSHAVARALQHGVIAL-----

YP\_003450678 | RRPRIIPDFIHFSLALHSAMVSSEP-----DD--AEEVPCKLSPREREVLDWASRGKTSWETGMVLGLSEKTVNFYLRNACQKMNAAATKVQAAAQAVREGLI-----

YP\_002910942 | AEIERVKGAMQLALVLFHSRINAKP-----PDSR--HRVES--LTLRERTVLKWAAMGKSYSEIADICGIRERTVKYHMANVVQKLDVSTAKQAVIVASRLGLAALSEG-----

YP\_001022984 | GEVTRLVADLQLFVAVHAQDTAMRVL-----VPERLQLERPKLTPRELDLSLRWTMDGKTAWEVGSIIMGISERTAVLHINNAMHKLACTNKHQAVLKALRLGLLR-----

YP\_001898047 | HTDAISGLAVLTALHLHEAVRRLDA-----SMSN--AP--IPSLTSREKECLQWAAAGKTSWEIARILSVSERTVIFHIGNATKKGATNRRQAVARAISRLRIAP-----

YP\_528967 | RINACLPPAQSFQTQVFCYSALML-----KLAQ--NK--QTHLTAREKESLFWACEGKTTWEISKILDVSEKTVIFHLLSATS KLGAVNRQHAVAKAILSGLIKPTL-----

YP\_659944 | VLDNAQMFCHTFATHLFFERYVLEI-----SASD--ETDRRELTKRELECLFWACEGKTAWEISQIINVSEKTVIFHLLGNSNTKLGAINRQHAVALAIKGGIIPKNI-----

YP\_106048 | DILRLLSLQLLASFVHAAMHELDD-----CRLR--ROGSCDLTARERESLQWAGRGKTAWEISKILGISERTVNFHLSNAARKIGANNRAQAVVIASARGLI-----

YP\_106160 | AKWRNAYLLGMQFNLFQSMRTPCR-----P--IPPSVHLTDREQMCLTWWARGKSSWVIANMLDISKYTVDFHIE NAMEKLNTRSRTPAAVKATROGLIFP-----

YP\_001777917 | VHMRLASLIGALFHQELHRLMKPH-----R--PEPALELSPROQECLAWVARGKSSWIAAIVGISPHTVDYHIAEAMKILGINSRTAAAVHAVTTGLIQV-----

YP\_972129 | RCVRYYALVTFAFHALYTRMFATEQT-----Q--IPPAVKLTSREAECLTWVYAGKSSWEIGRIMRISSEHTVNFHLLKNMAKFDTSASRVTAAVRAANLGLISIP-----

YP\_004012994 | TLLHKVQALAIQPHLAFTELEKIET-----PLTE--NLAEVYLTEREKEIMSWAAEGKSDSVIAEILGVSHSTVRFHMNNVFKKLNANERTLATVKAIRHGLILPSFIG-----

NP\_768520 | DRMAHLTTLASAFHNAVAQITPPL-----DES--CEDPIPTPRETECEILYVWAEKSAWVIGQLVNVTDNTVNFHMKNVIRKLGAAANRTNAVAKATRRGII-----

YP\_567541 | KGAMQLIGVYAH--NRIRSLHRPKP-----QRRLLTSRECEILWAAHAGKTAWEISIIHLIAERTVKFHLIEASKLNNAVNRTAATAVAKALAFGLIKL-----

YP\_484040 | KGAMQLIGVYAH--NRLRSLNRPKP-----QRRLLTSRECEILSWAAQKTAWEISIMILRIERTVKFHLIEASRKLNAVNRTAATAVAKALSLGLIRL-----

YP\_002966880 | KPAVHMIIAMYAF--ERARQVGRRPAPK-----P-----PSNPLTQREQEVLTWAAALGKSSRDTAEIMQITERTALAHAVNATHKLGAAANRTQAVVRAMQSKFIRV-----

YP\_781245 | KPALHLMAMYAF--DRIRSLVS--PAN-----D-----APRRLTHRECTLNWTAAQKSAWEIGEILQIAQRTAEHLATAARKLGAVNKTHAVAIARQKLIAP-----

YP\_002495629 | RRGLHMLGLYAWGAATRTTEDRRRS-----E-----PGRLLSARERDVLSWAAMGRREEIATILGVSHETVATHLKSARIKIGARNRTTQTVVEALRKRITL-----

YP\_001776815 | RAALHLVAIYAM--STAKAIARRRGL-----SEDD--GTPPSPLTGREAECLKWSSTGKSAWEIGVILSISRTVEHHLGSAVRRKLSVTRTQAVAEALRRHIIID-----

YP\_001641953 | RGMLTLLASVYVVGQTLIDNGPSE-----RRMG--LTPRERESLQWVAEGKTDWEIGELMGISRHGVDFHLRSARVKLGCVSRTPQAVAEGRFRGLII-----

YP\_002497059 | RGMLTLVGTVALGQVLLANGQAE-----ALSEPLSPRERESLQWADGKSDWEIGEAMGISEHGAIRHLRAVRRKLGTTSRHAVALGLRLGIIIS-----

YP\_001240084 | QISKYRHELHLIAIYLYARLDVTP-----TP--A--SPLRPLCTQREICLQWAAARGKSSALDTAEIINVSRRTVVFHTQNAKRKLGAVTVQQAQAVAKGLAYDIIGM-----

NP\_106660 | VAEQYEQALEIMAMCFHIGVRRKLA-----RG--L--AVDGVSLTPREYECLEWTAAGKSAWEIGCILGKERTAAFHLDNAKKKLGVRTKNQAVTLLASSRSSIL-----

YP\_003259225 | NIVEKNKDKLQMLLIVIEHEKITTTLY--KEIT--QTPQSKQDKEIFSQRENEILYWASMGKTYPEIAILDILDKISTVKFPHIGNVVKLGVLNAKHAIRLGVLEQLIKP--EPL-----

YP\_003017024 | SIVEENKDKLQMLLITVHEKITTTLY--KEMT--QSTQSRKQGDKEIFSQRENEILYWASMGKTYPEIAILDILDKISTVKFPHIGNVVKLGVLNAKHAIRLGVLEQLIKP--EPS-----

YP\_003331714 | EIVQNNKEKLQMLLISAEKLTSLY--REMS--KNNRNSKSEQEADLFSQRENEILYWASMGKTYPEIAILDILDKISTVKFPHIGNVVKLGVLNAKHAIRLGVEMNLIKPVEPVKARS-----

YP\_003885142 | EIQNNKDKLQMLLISAEKLTSLY--REMS--RNRNNSKSEQEADLFSQRENEILYWASMGKTYPEIAILDILDKISTVKFPHIGNVVKLGVLNAKHAIRLGVEMNLIKPVEPVKARS-----

YP\_003002472 | EIQNNRDKLQMLLISAEKLTSLH--REMS--RNRHNSKQEQEADIFSQRENEILYWASMGKTYPEIAILDILDKISTVKFPHIGNVVKLGVLNAKHAIRLGVEMNLIKPVEPVKARS-----

YP\_002985768 | NMIHGNQEKLQMLLIATHEKLTSLY--RELA--ESRQHR--SNDMLFSERENDILYWASMGKTYPEIAILDILDKISTVKFPHIGNVVKLGVLNAKHAIRMGIEMNLIIRRV-----

YP\_001005891 | ESIEINKEKIQMLLILTHEKMLGLY--QSNDSKNENRNPKIERDIFSPRENEILYWASMGKTYPEIAILDILDKISTVKFPHIGNVVKLGVLNAKHAIRLGIELKLIKPI-----

YP\_003019697 | KFIEEKDTPQMLLIDAYEKIISLCL--REMIESKK--QLNNKE--MFSQRENEILYWASMGKTYPEIAILDILDKISTVKFPHIGNVVKLGVLNAKHAIRLGVLEQLIKPVQ-----

YP\_003261727 | DVIESNKDKLQMLTMTIHAETISLY--REMIRNKEDERSNDKD--IFSQRENEILYWASMGKTYPEIAILDILDKISTVKFPHIGNVVKLGVLNAKHAIRLGIELQIRIPVQS-----

YP\_002934275 | ---RNRGVLQMLLIDAHERFINGQ--RQITAQRHCSNKEPIENIFSTRENEILYWASMGKTYPEIAILDILDKISTVKFPHIGNVVKLGVLNAKHAIRLGVLEQLIKPIEG-----

NP\_670674 | SRVLNDRDLQMLLIEHMKLTLQQRNMNIQERQKGMGPKAIIISPRENEVLYWASMGKTYPEIAILDILDKISTVKFPHIGNVVKLGVLNAKHAIRLGVLEQLIKPILA-----

YP\_003520251 | QRLASEQGTQMLLIDFNEQMYRLAGAEAEAPTVNQNAD--KTFISSRENEVLYWASMGKTYPEIAILDILDKISTVKFPHIGNVVKLGVLNAKHAIRLGVLEQLIKPASAAR-----

YP\_001906896 | ETFIKNKGEISLLASVHETYTLT--SLSEKNASRSRENASRFTERENEILYWASMGKTYPEIAILDILDKISTVKFPHIGNVVKLGVLNAKHAIRLGMELQLIKPV-----

YP\_003941575 | ELLIQHGDISLLASVHETYTLT--SLSEKDT--DKHSQPTPRENEILHWTSLGKTYQETGMILGIVRTVKFPHMSNIVKMGVANARHARLGVLEQLIKPVE-----

YP\_003729882 | FDIDKHRKFMFLIHLHQKTLNLY-----SQHQQ--KKNAPLSPRERQILKWSVDGKTYAEIAIILSIAERTVKFPHMGNVKMLGVNNAARHAIKLGAEELLEN-----

YP\_002924396 | FFDID--REKMYLLVKTQKLLSLY-----EKFEIPTKKNIGLSKRENEILHWSIGKTYQETSKITGICEKSIKFKMKNITNKLGAINSRHAIKLAYELKLLKQISYAF-----

YP\_001832058 | ARHYELIRDMVHVVAHFIQORAFEMH-----HQDEGIDINTTKREIEALSWSAEGKTFLEDISVLMRISQETVKAHLDARSYKLGALNRIHAVAIAIRAGLRI-----

YP\_001669935 | -----MTDNARYS-----QPPADAPVRLTPRERQVLLWCAYGKSSWEIGRILDKCESTVNFHVSNIILRKFVDPTRVVAVIKAIRYGLLAEQ-----

YP\_001748729 | -----MKANTQOI-----EDSQADTPIRLTPREQVLLWCAYGKSSWEIGQILQCQESTVNFHVNILRKFVDPTRVAVIKAIRYGLLAEQ-----

Accession Number-to-Species Key for **Table S4**.

| Accession Number | Species & Strain                                               | Accession Number | Species & Strain                                                         |
|------------------|----------------------------------------------------------------|------------------|--------------------------------------------------------------------------|
| YP_001747665     | <i>Pseudomonas putida</i> W619                                 | YP_001437405     | <i>Cronobacter sakazakii</i> ATCC BAA-894                                |
| YP_001991323     | <i>Rhodopseudomonas palustris</i> TIE-1                        | YP_003941366     | <i>Enterobacter lignolyticus</i> SCF1                                    |
| YP_569310        | <i>Rhodopseudomonas palustris</i> BisB5                        | YP_003530769     | <i>Erwinia amylovora</i> CFBP1430                                        |
| YP_002232821     | <i>Burkholderia cenocepacia</i> J2315                          | YP_002649216     | <i>Erwinia pyrifoliae</i> Ep1/96                                         |
| YP_624828        | <i>Burkholderia cenocepacia</i> AU 1054                        | YP_001908006     | <i>Erwinia tasmaniensis</i> Et1/99                                       |
| YP_002158591     | <i>Vibrio fischeri</i> MJ11                                    | YP_003519711     | <i>Pantoea ananatis</i> LMG 20103                                        |
| YP_002265247     | <i>Aliivibrio salmonicida</i> LF11238                          | YP_206883        | <i>Vibrio fischeri</i> ES114                                             |
| YP_855658        | <i>Aeromonas hydrophila</i> subsp. <i>hydrophila</i> ATCC 7966 | YP_001143989     | <i>Aeromonas salmonicida</i> subsp. <i>salmonicida</i> A449              |
| YP_776923        | <i>Burkholderia ambifaria</i> AMMD                             | YP_003267496     | <i>Haliangium ochraceum</i> DSM 14365                                    |
| YP_002955225     | <i>Desulfovibrio magneticus</i> RS-1                           | YP_003450678     | <i>Azospirillum</i> sp. B510                                             |
| YP_002537872     | <i>Geobacter daltonii</i> FRC-32                               | YP_002910942     | <i>Burkholderia glumae</i> BGR1                                          |
| YP_002871035     | <i>Pseudomonas fluorescens</i> SBW25                           | YP_001022984     | <i>Methylibium petroleiphilum</i> PM1                                    |
| NP_106527        | <i>Mesorhizobium loti</i> MAFF303099                           | YP_001898047     | <i>Ralstonia pickettii</i> 12J                                           |
| YP_001242900     | <i>Bradyrhizobium</i> sp. BTAi1                                | YP_528967        | <i>Saccharophagus degradans</i> 2-40                                     |
| YP_001203095     | <i>Bradyrhizobium</i> sp. ORS278                               | YP_659944        | <i>Pseudoalteromonas atlantica</i> T6c                                   |
| YP_001927660     | <i>Methylobacterium populi</i> BJ001                           | YP_106048        | <i>Burkholderia mallei</i> ATCC 23344                                    |
| YP_002547516     | <i>Agrobacterium vitis</i> S4                                  | YP_106160        | <i>Burkholderia mallei</i> ATCC 23344                                    |
| YP_003558208     | <i>Shewanella violacea</i> DSS12                               | YP_001777917     | <i>Burkholderia cenocepacia</i> MC0-3                                    |
| YP_777789        | <i>Burkholderia ambifaria</i> AMMD                             | YP_972129        | <i>Acidovorax citrulli</i> AAC00-1                                       |
| YP_003749681     | <i>Ralstonia solanacearum</i> PSI07                            | YP_004012994     | <i>Rhodomicrobium vannielii</i> ATCC 17100                               |
| YP_001715477     | <i>Acinetobacter baumannii</i> AYE                             | NP_768520        | <i>Bradyrhizobium diazoefficiens</i> USDA 110                            |
| YP_001083200     | <i>Acinetobacter baumannii</i> ATCC 17978                      | YP_567541        | <i>Rhodopseudomonas palustris</i> BisB5                                  |
| YP_003734010     | <i>Acinetobacter oleivorans</i> DR1                            | YP_484040        | <i>Rhodopseudomonas palustris</i> HaA2                                   |
| YP_002911505     | <i>Burkholderia glumae</i> BGR1                                | YP_002966880     | <i>Methylobacterium extorquens</i> AM1                                   |
| YP_003978623     | <i>Achromobacter xylosoxidans</i> A8                           | YP_781245        | <i>Rhodopseudomonas palustris</i> BisA53                                 |
| YP_002947664     | <i>Variovorax paradoxus</i> S110                               | YP_002495629     | <i>Methylobacterium nodulans</i> ORS 2060                                |
| YP_003750859     | <i>Ralstonia solanacearum</i> PSI07                            | YP_001776815     | <i>Methylobacterium radiotolerans</i> JCM 2831                           |
| NP_521406        | <i>Ralstonia solanacearum</i> GMI1000                          | YP_001641953     | <i>Methylobacterium extorquens</i> PA1                                   |
| YP_003744152     | <i>Ralstonia solanacearum</i> CFBP2957                         | YP_002497059     | <i>Methylobacterium nodulans</i> ORS 2060                                |
| YP_001117674     | <i>Burkholderia vietnamiensis</i> G4                           | NP_001240084     | <i>Bradyrhizobium</i> sp. BTAi1                                          |
| YP_623508        | <i>Burkholderia cenocepacia</i> AU 1054                        | NP_106660        | <i>Mesorhizobium loti</i> MAFF303099                                     |
| YP_001583946     | <i>Burkholderia multivorans</i> ATCC 17616                     | YP_003259225     | <i>Pectobacterium wasabiae</i> WPP163                                    |
| YP_105961        | <i>Burkholderia mallei</i> ATCC 23344                          | YP_003017024     | <i>Pectobacterium carotovorum</i> subsp. <i>carotovorum</i> PC1          |
| YP_002909041     | <i>Burkholderia glumae</i> BGR1                                | YP_003331714     | <i>Dickeya dadantii</i> Ech586                                           |
| YP_002907673     | <i>Burkholderia glumae</i> BGR1                                | YP_003885142     | <i>Dickeya dadantii</i> 3937                                             |
| YP_003910271     | <i>Burkholderia</i> sp. CCGE1003                               | YP_003002472     | <i>Dickeya zeae</i> Ech1591                                              |
| YP_001888024     | <i>Burkholderia phytofirmans</i> PsJN                          | YP_002985768     | <i>Dickeya dadantii</i> Ech703                                           |
| YP_003608086     | <i>Burkholderia</i> sp. CCGE1002                               | YP_001005891     | <i>Yersinia enterocolitica</i> subsp. <i>enterocolitica</i> 8081         |
| YP_001860599     | <i>Burkholderia phymatum</i> STM815                            | YP_003019697     | <i>Pectobacterium carotovorum</i> subsp. <i>carotovorum</i> PC1          |
| YP_003847232     | <i>Gallionella capsiferiformans</i> ES-2                       | YP_003261727     | <i>Pectobacterium wasabiae</i> WPP163                                    |
| YP_001167907     | <i>Rhodobacter sphaeroides</i> ATCC 17025                      | YP_002934275     | <i>Edwardsiella ictaluri</i> 93-146                                      |
| YP_001043640     | <i>Rhodobacter sphaeroides</i> ATCC 17029                      | NP_670674        | <i>Yersinia pestis</i> KIM10+                                            |
| YP_001758389     | <i>Methylobacterium radiotolerans</i> JCM 2831                 | YP_003520251     | <i>Pantoea ananatis</i> LMG 20103                                        |
| YP_486928        | <i>Rhodopseudomonas palustris</i> HaA2                         | YP_001906896     | <i>Erwinia tasmaniensis</i> Et1/99                                       |
| YP_001603072     | <i>Gluconacetobacter diazotrophicus</i> PA1 5                  | YP_003941575     | <i>Enterobacter lignolyticus</i> SCF1                                    |
| YP_003262848     | <i>Halothiobacillus neapolitanus</i> c2                        | YP_003729882     | <i>Pantoea vagans</i> C9-1                                               |
| YP_002911546     | <i>Burkholderia glumae</i> BGR1                                | YP_002924396     | <i>Candidatus Hamiltonella defensa</i> 5AT ( <i>Acyrtosiphon pisum</i> ) |
| YP_001815695     | <i>Burkholderia ambifaria</i> MC40-6                           | YP_001832058     | <i>Beijerinckia indica</i> subsp. <i>indica</i> ATCC 9039                |
| YP_001115608     | <i>Burkholderia vietnamiensis</i> G4                           | YP_001669935     | <i>Pseudomonas putida</i> GB-1                                           |
| YP_002874841     | <i>Pseudomonas fluorescens</i> SBW25                           | YP_001748729     | <i>Pseudomonas putida</i> W619                                           |

**Table S5. Conservation among 100 LasR homologs at mutated sites in this study.**

| residue    | Y56  |      | W60  |      | R61  |      | D73  |       | T75  |      | W88  |      | Y93F |      | T115 |      | S129 |      |
|------------|------|------|------|------|------|------|------|-------|------|------|------|------|------|------|------|------|------|------|
|            | Freq | %    | Freq | %    | Freq | %    | Freq | %     | Freq | %    | Freq | %    | Freq | %    | Freq | %    | Freq | %    |
| <b>A</b>   | 1    | 1.0  | 0    | 0.0  | 4    | 4.0  | 0    | 0.0   | 3    | 3.0  | 0    | 0.0  | 5    | 6.8  | 16   | 16.2 | 0    | 0.0  |
| <b>C</b>   | 3    | 3.0  | 0    | 0.0  | 1    | 1.0  | 0    | 0.0   | 0    | 0.0  | 0    | 0.0  | 1    | 1.4  | 7    | 7.1  | 5    | 5.1  |
| <b>D</b>   | 0    | 0.0  | 0    | 0.0  | 0    | 0.0  | 99   | 100.0 | 0    | 0.0  | 0    | 0.0  | 3    | 4.1  | 0    | 0.0  | 0    | 0.0  |
| <b>E</b>   | 0    | 0.0  | 0    | 0.0  | 2    | 2.0  | 0    | 0.0   | 0    | 0.0  | 0    | 0.0  | 4    | 5.5  | 0    | 0.0  | 0    | 0.0  |
| <b>F</b>   | 4    | 4.0  | 0    | 0.0  | 10   | 10.0 | 0    | 0.0   | 0    | 0.0  | 0    | 0.0  | 15   | 15.2 | 0    | 0.0  | 1    | 1.0  |
| <b>G</b>   | 0    | 0.0  | 0    | 0.0  | 2    | 2.0  | 0    | 0.0   | 0    | 0.0  | 0    | 0.0  | 0    | 0.0  | 1    | 1.0  | 2    | 2.0  |
| <b>H</b>   | 3    | 3.0  | 0    | 0.0  | 0    | 0.0  | 0    | 0.0   | 0    | 0.0  | 0    | 0.0  | 0    | 0.0  | 0    | 0.0  | 0    | 0.0  |
| <b>I</b>   | 0    | 0.0  | 0    | 0.0  | 5    | 5.1  | 0    | 0.0   | 15   | 15.2 | 0    | 0.0  | 3    | 4.0  | 1    | 1.0  | 0    | 0.0  |
| <b>K</b>   | 1    | 1.0  | 0    | 0.0  | 6    | 6.1  | 0    | 0.0   | 0    | 0.0  | 0    | 0.0  | 6    | 8.0  | 0    | 0.0  | 0    | 0.0  |
| <b>L</b>   | 1    | 1.0  | 1    | 1.0  | 12   | 12.0 | 0    | 0.0   | 1    | 1.0  | 0    | 0.0  | 8    | 8.0  | 0    | 0.0  | 2    | 2.0  |
| <b>M</b>   | 1    | 1.0  | 0    | 0.0  | 10   | 10.0 | 0    | 0.0   | 0    | 0.0  | 0    | 0.0  | 0    | 0.0  | 0    | 0.0  | 0    | 0.0  |
| <b>N</b>   | 1    | 1.0  | 0    | 0.0  | 2    | 2.0  | 0    | 0.0   | 0    | 0.0  | 0    | 0.0  | 4    | 5.5  | 0    | 0.0  | 4    | 4.0  |
| <b>P</b>   | 0    | 0.0  | 0    | 0.0  | 0    | 0.0  | 0    | 0.0   | 0    | 0.0  | 0    | 0.0  | 0    | 0.0  | 0    | 0.0  | 0    | 0.0  |
| <b>Q</b>   | 0    | 0.0  | 0    | 0.0  | 7    | 7.1  | 0    | 0.0   | 0    | 0.0  | 0    | 0.0  | 0    | 0.0  | 0    | 0.0  | 0    | 0.0  |
| <b>R</b>   | 0    | 0.0  | 0    | 0.0  | 14   | 14.0 | 0    | 0.0   | 0    | 0.0  | 0    | 0.0  | 9    | 9.0  | 0    | 0.0  | 0    | 0.0  |
| <b>S</b>   | 0    | 0.0  | 0    | 0.0  | 4    | 4.0  | 0    | 0.0   | 1    | 1.0  | 0    | 0.0  | 1    | 1.4  | 28   | 28.3 | 65   | 65.7 |
| <b>T</b>   | 2    | 2.0  | 0    | 0.0  | 2    | 2.0  | 0    | 0.0   | 26   | 26.3 | 0    | 0.0  | 3    | 4.1  | 45   | 45.5 | 20   | 20.2 |
| <b>V</b>   | 0    | 0.0  | 0    | 0.0  | 18   | 18.0 | 0    | 0.0   | 53   | 53.5 | 0    | 0.0  | 8    | 8.0  | 1    | 1.0  | 0    | 0.0  |
| <b>W</b>   | 10   | 10.0 | 97   | 97.0 | 0    | 0.0  | 0    | 0.0   | 0    | 0.0  | 99   | 99.0 | 0    | 0.0  | 0    | 0.0  | 0    | 0.0  |
| <b>Y</b>   | 72   | 72.0 | 1    | 1.0  | 0    | 0.0  | 0    | 0.0   | 0    | 0.0  | 0    | 0.0  | 3    | 4.1  | 0    | 0.0  | 0    | 0.0  |
| <b>Gap</b> | 0    | 0.0  | 0    | 0.0  | 0    | 0.0  | 0    | 0.0   | 0    | 0.0  | 0    | 0.0  | 26   | 26.0 | 0    | 0.0  | 0    | 0.0  |

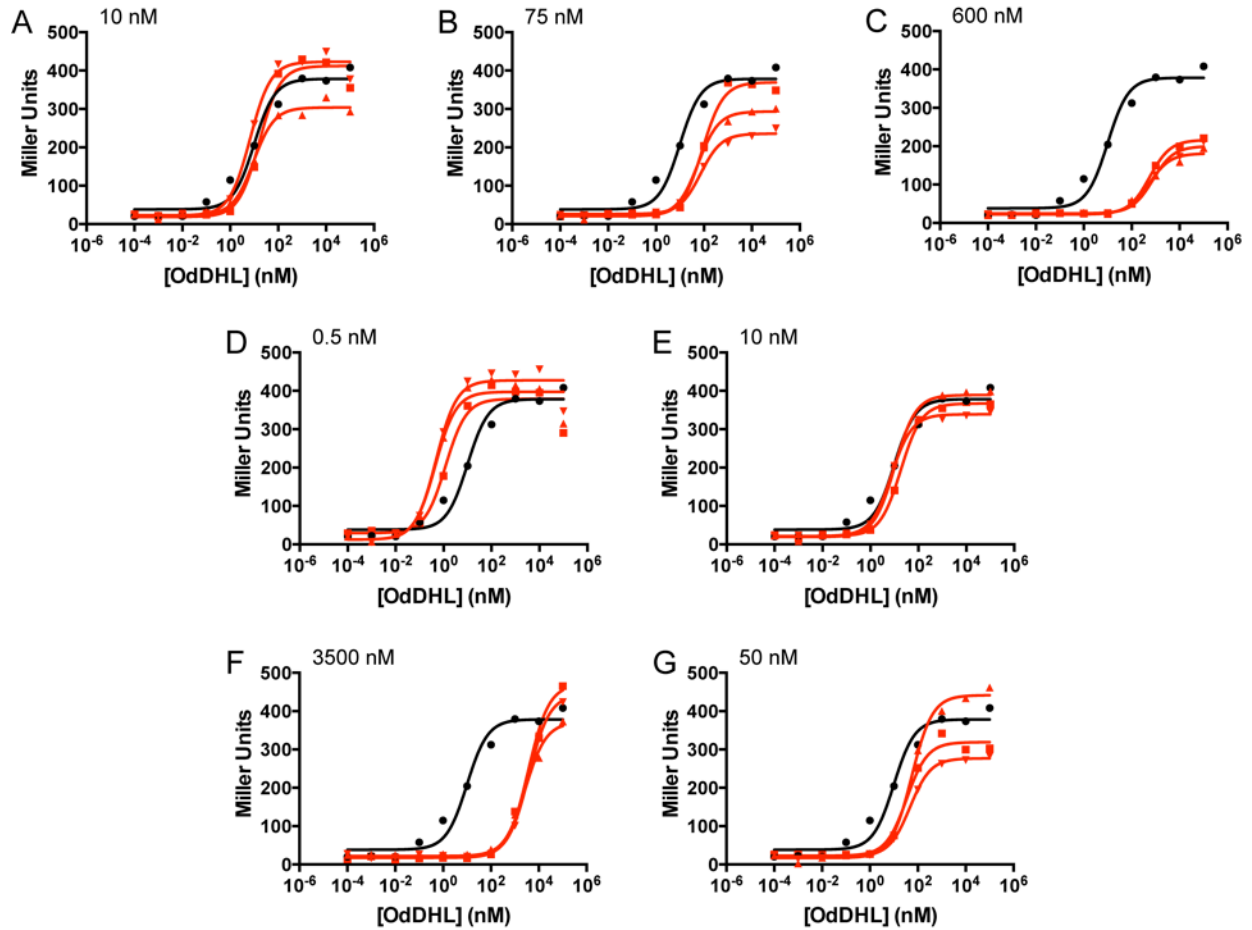

**Figure S1. Dose-response curves for mutant LasRs with OdDHL.** OdDHL dose-response curves used to calculate EC<sub>50</sub> values for OdDHL in each LasR mutant: (A) Y56F, (B) W60F, (C) R61M, (D) T75V, (E) Y93F, (F) T115V, and (G) S129A. For each plot, the three red curves compose a biological triplicate of data for OdDHL in the mutant, and the black curve is a representative replicate for OdDHL in wild-type LasR for comparison. The geometric mean of each EC<sub>50</sub> value is displayed on each plot and in **Table 1** in the main text.

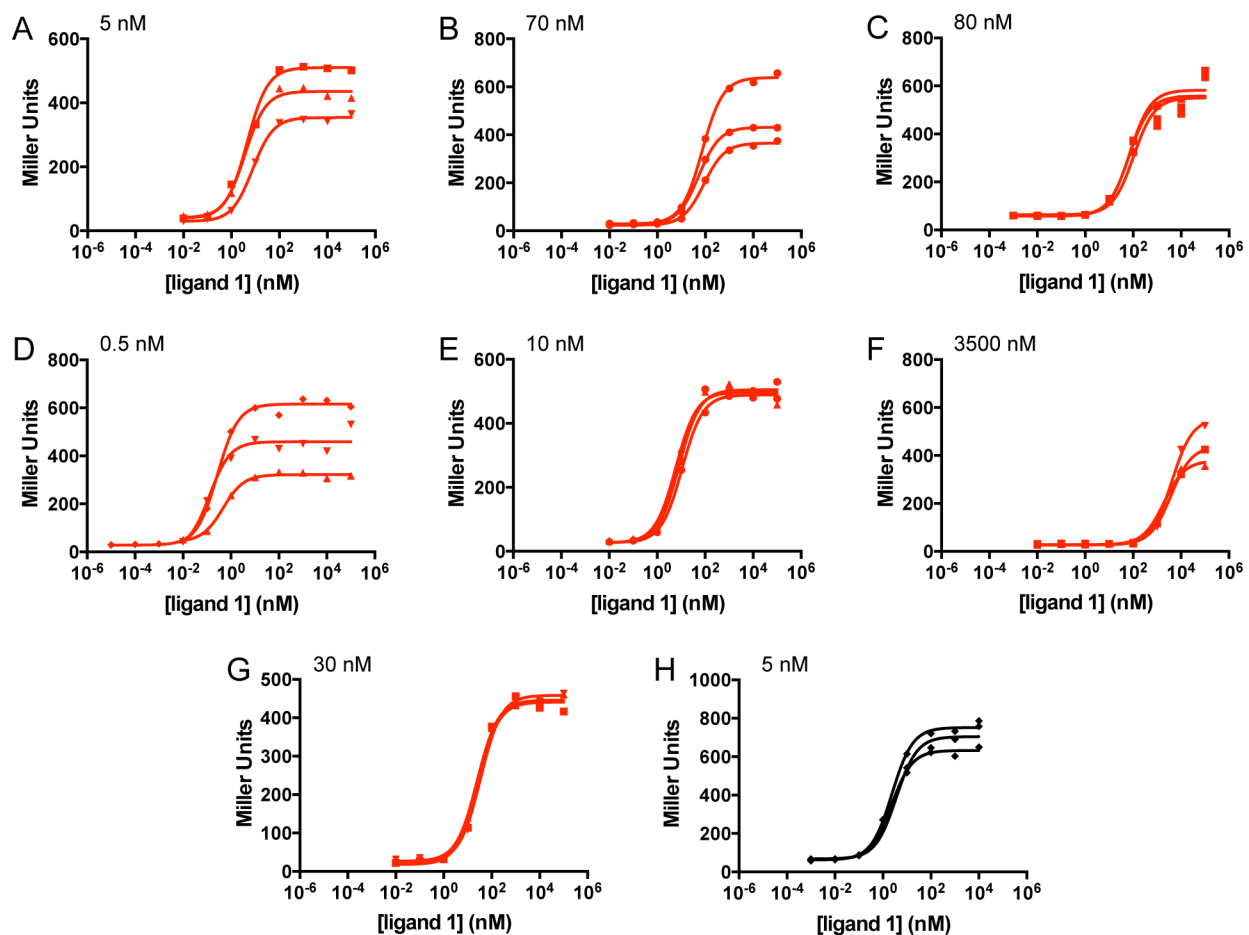

**Figure S2. Dose-response curves for mutant LasRs with ligand 1.** Ligand 1 dose-response curves used to calculate  $EC_{50}$  values for **1** in each LasR mutant: (A) Y56F, (B) W60F, (C) R61M, (D) T75V, (E) Y93F, (F) T115V, and (G) S129A. Panel (H) shows the dose-response curve for **1** in wild-type LasR. For each plot, the three curves compose a biological triplicate of data for **1**. The geometric mean of each  $EC_{50}$  value is displayed on each plot and in **Table 2** in the main text.

## References.

1. T. Bjarnsholt, P. Ø. Jensen, T. H. Jakobsen, R. Phipps, A. K. Nielsen, M. T. Rybtke, T. Tolker-Nielsen, M. Givskov, N. Høiby, O. Ciofu and S. C. F. S. Consortium, *PLoS ONE*, 2010, **5**, e10115.
2. S. Rajamani, W. D. Bauer, J. B. Robinson, J. M. Farrow, E. C. Pesci, M. Teplitski, M. Gao, R. T. Sayre and D. A. Phillips, *Mol. Plant. Microbe Interact.*, 2008, **21**, 1184.
3. B. Koch, T. Lijefors, T. Persson, J. Nielsen, S. Kjelleberg and M. Givskov, *Microbiology*, 2005, **151**, 3589.
4. Y. Chai and S. C. Winans, *Mol. Microbiol.*, 2004, **51**, 765.
5. C. H. Collins, J. R. Leadbetter and F. H. Arnold, *Nat. Biotechnol.*, 2006, **24**, 708.
6. P. Kiratisin, K. D. Tucker and L. Passador, *J. Bacteriol.*, 2002, **184**, 4912.
7. D. A. D'Argenio, M. Wu, L. R. Hoffman, H. D. Kulasekara, E. Déziel, E. E. Smith, H. Nguyen, R. K. Ernst, T. J. Larson Freeman, D. H. Spencer, M. Brittnacher, H. S. Hayden, S. Selgrade, M. Klausen, D. R. Goodlett, J. L. Burns, B. W. Ramsey and S. I. Miller, *Mol. Microbiol.*, 2007, **64**, 512.
8. G. S. Shadel, R. Young and T. O. Baldwin, *J. Bacteriol.*, 1990, **172**, 3980.
9. Z.-Q. Luo, A. J. Smyth, P. Gao, Y. Qin and S. K. Farrand, *J. Biol. Chem.*, 2003, **278**, 13173.
10. J. R. Lamb, H. Patel, T. Montminy, V. E. Wagner and B. H. Iglewski, *J. Bacteriol.*, 2003, **185**, 7129.
11. O. Ciofu, L. F. Mandsberg, T. Bjarnsholt, T. Wassermann and N. Høiby, *Microbiology*, 2010, **156**, 1108.
12. J. Slock, D. VanRiet, D. Kolibachuk and E. P. Greenberg, *J. Bacteriol.*, 1990, **172**, 3974.
13. A. M. Lujan, A. J. Moyano, I. Segura, C. E. Argarana and A. M. Smania, *Microbiology*, 2007, **153**, 225.
14. K. M. Sandoz, S. M. Mitzimberg and M. Schuster, *Proc. Natl. Acad. Sci. U. S. A.*, 2007, **104**, 15876.
15. G. Chen, L. R. Swem, D. L. Swem, D. L. Stauff, C. T. O'Loughlin, P. D. Jeffrey, B. L. Bassler and F. M. Hughson, *Mol. Cell*, 2011, **42**, 199.
16. M. J. Lintz, K.-i. Oinuma, C. L. Wysoczynski, E. P. Greenberg and M. E. A. Churchill, *Proc. Natl. Acad. Sci. U. S. A.*, 2011, **108**, 15763.
17. J.-H. Lee, Y. Lequette and E. P. Greenberg, *Mol. Microbiol.*, 2006, **59**, 602.
18. S. Chugani, M. Whiteley, K. Lee, D. A. D'Argenio, C. Manoil and E. P. Greenberg, *Proc. Natl. Acad. Sci. U. S. A.*, 2001, **98**, 2752.
19. J. P. Gerdt, C. E. McInnis, T. L. Schell, F. M. Rossi and H. E. Blackwell, *Chem. Biol.*, 2014, in press.
